1 LRH: DI GIACOMO, LÓPEZ-LANÚS AND KOPUCHIAN

2 RRH: NEW SPECIES OF *SPOROPHILA* SEEDEATER

3

4 A NEW SPECIES OF SEEDEATER (EMBERIZIDAE: *SPOROPHILA*) FROM THE  
5 IBERÁ GRASSLANDS, IN NORTHEAST ARGENTINA

6

7 ADRIÁN S. DI GIACOMO<sup>1\*</sup>, BERNABÉ LÓPEZ-LANÚS<sup>2,3</sup>, AND CECILIA KOPUCHIAN<sup>4</sup>

8

9 DATE: 05-DEC-2012

10

11 <sup>1</sup>Laboratorio de Ecología y Comportamiento Animal, Instituto de Ecología, Genética y  
12 Evolución de Buenos Aires (IEGEB-CONICET), Facultad de Ciencias Exactas y  
13 Naturales, Universidad de Buenos Aires, Pabellón II Ciudad Universitaria, C1428EGA  
14 Buenos Aires, Argentina

15 <sup>2</sup>Departamento de Conservación, Aves Argentinas/Asociación Ornitológica del Plata,  
16 Matheu 1246, C1249AAB Buenos Aires, Argentina

17 <sup>3</sup>Audiornis Consultores, Pacheco de Melo 2534, CP1425 Buenos Aires, Argentina

18 <sup>4</sup>División Ornitología, Museo Argentino de Ciencias Naturales Bernardino Rivadavia, Av.  
19 Angel Gallardo 470, C1405DJR Buenos Aires, Argentina

20 \*Corresponding autor

21 Email: [digiacomo@ege.fcen.uba.ar](mailto:digiacomo@ege.fcen.uba.ar)

22 Telephone: (54-11) 4576 3300 ext 200

23 Fax: (54 11) 4576 3367

1           ABSTRACT.- We describe a new species of capuchino of the genus *Sporophila*  
2 (Emberizidae) of the Esteros del Iberá, province of Corrientes, in northeastern Argentina.  
3 This species would have remained unidentified due to lack of ornithological explorations in  
4 the central area of the Esteros del Iberá. It has been confused with immature individuals of  
5 other *Sporophila* species. We made observations of behavior and habitat, playback  
6 experiments, comparative analyzes of the vocalizations and plumage with other sympatric  
7 species of the same genus, and we found this species, which we have named *Sporophila*  
8 *iberaensis*, inhabiting wet grasslands from the edges of the marshes, having a unique vocal  
9 repertoire and a unique plumage. Because of its restricted geographical distribution and the  
10 threats that have their habitat, this new species should be categorized as Vulnerable on the  
11 IUCN Red List.

12           Key words: Argentina, conservation, Iberá wetland, new species, grassland birds,  
13 *Sporophila*, vocalizations

14

15           RESUMEN.- Describimos una nueva especie de capuchino del género *Sporophila*  
16 (Emberizidae) de los Esteros del Iberá, provincia de Corrientes, en el noreste de Argentina.  
17 Esta especie habría permanecido sin identificar debido a la falta de exploraciones  
18 ornitológicas en la región central de los Esteros del Iberá y además habría sido confundida  
19 con individuos inmaduros de otras especies de *Sporophila*. Realizamos observaciones de  
20 comportamiento y hábitat, experimentos de playback, análisis comparativos de las  
21 vocalizaciones y comparaciones del plumaje con otras especies simpátricas del mismo  
22 género encontrando que esta especie, a la que nombramos como *Sporophila iberaensis*,

- 1 habita pastizales húmedos de los bordes de los esteros, presentando un repertorio vocal y un
- 2 plumaje únicos. Debido a su distribución restringida y las amenazas que tiene su hábitat,
- 3 esta nueva especie debe ser categorizada como Vulnerable en la lista roja de la IUCN.
- 4

1            *SPOROPHILA* IS A Neotropical genus of ca 30 species of small (8-10 g) seedeaters of  
2 forests, grasslands and wetlands from southern United States to southern South America  
3 (Ridgely and Tudor 1989). In recent years a group of smaller species of *Sporophila* known  
4 as capuchinos, that inhabit southern South America grasslands, have attracted increasing  
5 interest by researchers who have studied their plumage, vocalizations, breeding ecology,  
6 systematic and evolution (Lijtmaer et al. 2004, Facchinetti et al. 2008, 2011, Areta 2008,  
7 2009, Areta et al. 2011, Benites et al. 2010, Machado and Silveira 2011, Campagna et al.  
8 2009, 2012, Areta and Repenning 2011a, 2011b, Repenning et al. 2010). In spite of diverse  
9 plumages, vocalizations, and habitat uses of the species of this group some studies indicate  
10 that they are genetically very similar (Lijtmaer et al. 2004, Campagna et al. 2009, 2012).  
11 This decoupling between the homogeneity of the genetic markers and phenotypic diversity  
12 would be best explained as a group that had undergone a recent radiation beginning in the  
13 Pleistocene, leaving genetic signatures of incomplete lineage sorting, introgressive  
14 hybridization and demographic expansions (Campagna et al. 2012). Another notable aspect  
15 of the capuchinos is their link with conservation issues. Capuchinos have a strong  
16 dependence to remaining natural grasslands and they have been used as indicator species  
17 for detecting important regions or sites for conservation such as Endemic Bird Areas (EBA,  
18 Stattersfield et al. 1998) and Important Bird Areas (IBAs, Devenish et al. 2009). Finally,  
19 most capuchinos are globally threatened because their small or geographically restricted  
20 populations are subject to habitat loss and capture for the illegal wildlife market (BirdLife  
21 International 2012) and because mainly mature colored males are targeted, this may have  
22 other demographic implications (Azpiroz et al. 2012).

1           In October 2001 and October 2002, A.S.D.G. studied the avifauna of grasslands in  
2   Esteros del Iberá and Aguapey River basin, in the province of Corrientes, NE Argentina  
3   (see Di Giacomo 2005 and Di Giacomo et al. 2010). During this fieldwork he recorded  
4   many individuals of the genus *Sporophila*. As noted in his field-notebook, on 18 October  
5   2001 he observed two individuals of *Sporophila* in a wet grassland area 14 km S of Galarza  
6   (28° 12' 55" S 56° 43' 32" W) that were not identified as they exhibited plumages which  
7   seemed to be incomplete. These individuals had cream or dull colored underparts that  
8   looked more like females of the genus, but they had a conspicuous gray crown, black collar,  
9   brown wings, back and rump and black bill. These birds were observed together with other  
10  individuals of *S. palustris* and *S. cinnamomea*.

11           Between 2007 and 2011, A.S.D.G. studied the birds of the grasslands in the Esteros  
12  del Iberá, in Corrientes Province, Argentina, as part of a long term project for evaluating  
13  changes in the grassland avifauna as a result of livestock grazing. During this fieldwork  
14  A.S.D.G. recorded many individuals from six species of capuchinos of the genus  
15  *Sporophila* every year.

16           In the annual surveys on November and December of 2008 and 2009 A.S.D.G.  
17  observed additional unusual individuals with same plumage as the unidentified seedeaters  
18  previously observed near Galarza in 2001. In 2008 these seedeaters were recorded as  
19  immature *S. ruficollis*. However, during 2009 these birds were noted as “new form”  
20  because they were often observed in pairs and had breeding territories, similar to other  
21  *Sporophila* that regularly breed in the region. Females were similar to the other species of  
22  the genus. Male songs were noted as different from recordings of voices of other sympatric

1 species including those with a similar plumage (*S. ruficollis* or *S. cinnamomea*). Expanding  
2 the search of these birds in a vast area of the region, it was clear that these undescribed  
3 seedeaters were defending territories in a particular type of habitat and that they were  
4 probably nesting in sites where other *Sporophila* were rare or absent. During this survey  
5 distinctive songs of two individuals separated by 50 km (Estancia San Nicolás y Cambyretá  
6 Reserve) were recorded, and they were used to assess the playback response of other new  
7 individuals that were observed in the grasslands. A total of 15 sight records of this  
8 unknown seedeater (total of 19 individuals), were obtained in November and December  
9 2009. In 8 of these encounters he was able to assess their playback response, obtaining  
10 positive responses to the recording of the unidentified *Sporophila* and negative for  
11 recordings of other sympatric species.

12       During November and December 2010, B.L.L., C.K. and A.S.D.G. obtained an  
13 additional 23 records (35 individuals) covering a larger number of sites. They observed  
14 pairs on breeding territories and conducted additional playback trials. Most individuals  
15 recorded were paired with males defending territories and singing in response to the same  
16 distinctive song of the unidentified *Sporophila* recorded in 2009. These seedeaters did not  
17 respond to the voices of the other sympatric species of the genus that had similar plumage  
18 characteristics (*S. cinnamomea* and *S. ruficollis*), and they did not respond to vocalizations  
19 of other species of the genus (*S. palustris*, *S. hypochroma*, *S. hypoxantha* and *S. pileata*). In  
20 February 2011, the authors returned to the field to continue the observations and recorded  
21 11 records and observed 16 individuals. Some of the individuals were found in the same  
22 territories as in the November and December 2010 survey at the Estancia San Nicolás.

1 A.S.D.G. and C.K. observed one pair feeding two young birds. Finally, at Estancia San  
2 Alonso, B.L.L. used playback to test the response, recorded more vocalizations, and then  
3 collected one individual for further study.

4 Authors recorded new observations (31 records, 39 individuals) and performed new  
5 playback trials during the annual survey to the Iberá grasslands in November and December  
6 2011, and January 2012. Six observations occurred at the same point counts as in 2010, and  
7 another two observations occurred at the same point counts as in 2009. From a total of 14  
8 playback trials in 2011, 13 individuals responded positively to the song of the unidentified  
9 *Sporophila*. These birds did not respond to the songs of other sympatric species, and only  
10 one individual did not respond to any stimulus. Two of the individuals essayed were sound-  
11 recorded and then collected near Estancia Don Luis and at Estancia El Tránsito.  
12 Additionally, B.L.L. obtained other 3 records (4 individuals) from the Aguapey River  
13 Basin, during a visit in November 2011.

14 After analyzing the information obtained from our 81 field records during our years  
15 of fieldwork in the area and our knowledge of seedeaters of the genus *Sporophila*, and our  
16 study of museum specimens, we found that both the plumage and vocalizations were  
17 consistently different from all other sympatric species of *Sporophila*. We have also  
18 observed that the main population of these unidentified *Sporophila* was quite common in  
19 the distinctive wet grassland habitat that is dominated by flooded *Paspalum* tall grasses  
20 surrounding marshes in the sandy hills area in the north of the Esteros del Iberá, locally  
21 called “lomadas arenosas” (sensu Carnevalli 1994). Thus, based on the differences of

1 coloration of the plumage, vocalizations and reproductive habitat, we propose to name this  
2 new seedeater

3 ***Sporophila iberensis*, sp. nov.**

4 Iberá's Seedeater

5 *Capuchino del Iberá* (Spanish)

6 *Caboclinho-do-Iberá* (Portuguese)

7 *Holotype*.- Colección Nacional de Ornitología, Museo Argentino de Ciencias  
8 Naturales "Bernardino Rivadavia" (MACN), Buenos Aires, no. MACN-Or 72854. Skin,  
9 adult male, skull 100% ossified, testes 7 x 5 mm and 6 x 4 mm, netted in a wet grassland in  
10 Estancia San Alonso, Esteros del Iberá, department of Concepción, province of Corrientes  
11 (28° 18' 10. 2", 57° 26' 25.5" W). Collected 19 February 2011 by B.L.L., prepared by C.K.  
12 Sound-recorded by B.L.L.; recording archived at Macaulay Library, Cornell Laboratory of  
13 Ornithology, Ithaca, New York (accession numbers: MLNS to be confirmed). A copy of  
14 sound-record is archived in Colección Nacional de Ornitología, Museo Argentino de  
15 Ciencias Naturales "Bernardino Rivadavia" (MACN), Buenos Aires (accession numbers: to  
16 be confirmed) and available on Xeno-canto ([www.xeno-canto.org](http://www.xeno-canto.org)) (accession numbers: to  
17 be confirmed).

18 *Diagnosis: Morphology*.-An emberizid, assignable to the genus *Sporophila* by the  
19 combination of bill shape, size and pattern of plumage coloration. In appearance is closely  
20 similar to sympatric members of the 'capuchino group' of the genus *Sporophila*. Males are



1 totally separable in plumage from all other species of the genus. Females are similar to  
2 other capuchino species. Male differ in plumage from other capuchinos by contrasting  
3 forehead and crown lead gray with the nape and hindneck blackish brown, joining lores,  
4 ear-covers, chin, throat and neck (Fig. 1). The back and rump are brown or olive brown,  
5 and breast, abdomen, belly and undertail covers are pale yellow to cinnamon. All  
6 specimens show white at the base of the tail feathers and the white wing speculum (on the  
7 dorsal view of remiges) looks larger than other capuchinos. Compared with sympatric *S.*  
8 *ruficollis*, the new species has the blackish brown throat extending to the dorsal neck  
9 reaching to form a tight collar but does not extend towards the body beyond the throat,  
10 unlike *S. ruficollis* where dark color of the throat reaches the breast. Unlike the new  
11 species, *S. ruficollis* has lead gray in the crown extended to the dorsal neck and back, but  
12 the rump is rufous, similar to the underparts. It has recently been described a color morph  
13 of *S. ruficollis*, called ‘caraguata’ (Areta et al. 2011), but unlike *S. iberaensis*, the black  
14 collar is broader and extends ventrally to the breast, and the underparts, back and rump are  
15 rufous. Another species with which the new species shares some characteristics of plumage  
16 is *S. cinnamomea*, which in its full adult plumage has a rufous throughout the body, except  
17 the lead grey in the crown and brown wings and tail. *S. iberaensis* might look like a  
18 immature male of *S. ruficollis* or *S. cinnamomea* with incomplete plumage in which only  
19 the color of the crown (gray) and the throat or neck (rufous or blackish brown) coincides  
20 with adult males and the rest of the plumage is similar to a female. However, because other  
21 characteristics of morphology and maturation of plumage in capuchinos, together with their  
22 unique vocalizations, makes it possible to readily differentiate immature capuchinos from  
23 the new species (see Remarks).

1 Morphological measurements of *S. iberaensis* are in the range from those of other  
2 sympatric capuchinos of genus *Sporophila* (Table 1).

3 *Diagnosis: Vocalizations.*- The vocalizations of *S. iberaensis* showed a typology  
4 common to the other capuchinos composed by introduction, main song and calls. However,  
5 each species of capuchino has certain characters in the main song or in the introduction,  
6 that are diagnostic (Narosky and Yzurieta 1987, Ridgely and Tudor 1989, Straneck 1990,  
7 Areta 2008, Areta et al. 2011, Areta and Repenning 2011a, Campagna et al. 2011). The  
8 vocalizations of *S. iberaensis* present two diagnostic notes that are very different from the  
9 homologous notes present in the vocalizations of other species of capuchinos. One note is  
10 present in the introduction, looking at the spectrogram with shape of an "Eiffel Tower"  
11 (Fig. 2A, C, D and E), reaching 5 to 7 kHz with greater amplitude (volume) in relation to  
12 other notes of the species. The other diagnostic note is present at the beginning of the main  
13 song (Fig. 2G, H, I, J, K and L), and compared to the homologous note in other species of  
14 capuchinos (Fig. 3), in *S. iberaensis* this note is unique because of its long duration,  
15 vibrato, "nasal" type of sound and notoriety of the harmonics (see detail in figure 2K). Both  
16 notes are very conspicuous to the human ear which makes it easy to differentiate this  
17 species from any other *Sporophila* in the field.

18 *Description of the holotype.*- See Figure 1 (individual at bottom right). Bill and legs  
19 black. Forehead and crown Medium Neutral Gray (capitalized color names follow Smithe  
20 1975). Incomplete collar with lores, ear-covers, chin and throat Dusky Brown. Nape Olive  
21 Brown with some feathers Dusky Brown. Some underparts of the collar with feathers  
22 Cream Color. Back, scapulars, rump and upper tail coverts Olive-Brown. Breast, abdomen,

1 belly and undertail coverts vary between Cinnamon and Cream Color. The side of the  
2 breast has a small spot in Dusky Brown. Upper wing coverts and alula Dusky Brown with  
3 borders in Olive-Brown. Primaries 9<sup>th</sup> to 8<sup>th</sup> Dusky Brown with anterior border in Olive-  
4 Brown. Primary 7<sup>th</sup> Dusky Brown with anterior border Olive Brown and base of the  
5 posterior vane white. Primary 6<sup>th</sup> to 2<sup>nd</sup> Dusky Brown with anterior border Olive Brown and  
6 base of the posterior and anterior vane white. Primary 1<sup>st</sup> Dusky Brown with anterior border  
7 Olive Brown. Secondary 1<sup>st</sup> Dusky Brown with anterior border Olive Brown. Secondary 2<sup>nd</sup>  
8 Dusky Brown with anterior border Olive Brown and base of the posterior vane white.  
9 Secondary 3<sup>rd</sup> to 6<sup>th</sup> Dusky Brown with anterior border Olive Brown and base of the  
10 posterior and anterior vane white. Primaries 8<sup>th</sup> to 6<sup>th</sup> with notch. Tertiaries Dusky Brown  
11 with borders Olive Brown. From the dorsal view the wings look Dusky Brown with a  
12 conspicuous white speculum that is broken by the absence of white between the Primary 1<sup>st</sup>  
13 and Secondary 1<sup>st</sup>. From a ventral view the wings look mainly white because of the  
14 extended white color of the primaries and also white in the axillaries feathers and wing  
15 lining region. The wrist region and underwing primary coverts are Dusky Brown. Rectrices  
16 are Dusky Brown with borders Olive Brown and the base of the anterior vanes are white.

17 *Measurements of holotype.*- Bill length (culmen exposed) 8.1 mm; wing length  
18 (chord) 51 mm; tail length 40 mm; tarsus length 13 mm; total length 102 mm; wingspan  
19 165 mm; body mass 8.5 g.

20 *Designation of paratypes.*- MACN-72855, skin, adult male, skull 100% ossified,  
21 testes 8 x 5 and 8 x 5 mm, netted in a wet grassland in a road near Estancia Don Luis,  
22 Esteros del Iberá, department of Ituzaingó, province of Corrientes (27° 51' 5.4", 56° 53'  
23 38.4" W). Collected 13 December 2011 by B.L.L., prepared by C.K. Sound-recorded by

1 B.L.L.; recording archived at Macaulay Library, Cornell Laboratory of Ornithology, Ithaca,  
2 New York (accession numbers: MLNS to be confirmed). A copy of sound-record is  
3 archived in Colección Nacional de Ornitología, Museo Argentino de Ciencias Naturales  
4 “Bernardino Rivadavia” (MACN), Buenos Aires (accession numbers: to be confirmed)...  
5 and available on Xeno-canto (accession numbers: to be confirmed). MACN-72856, skin,  
6 adult male, skull 100% ossified, testes 8 x 5 and 8 x 5 mm, netted in a wet grassland in  
7 Estancia El Tránsito, Esteros del Iberá, department of Concepción, province of Corrientes  
8 (28° 28' 2.4", 57° 42' 22.2" W). Collected 15 December 2011 by A.S.D.G., B.L.L. and  
9 C.K., prepared by C.K. Sound-recorded by B.L.L.; recording archived at Macaulay Library,  
10 Cornell Laboratory of Ornithology, Ithaca, New York (accession numbers: MLNS to be  
11 confirmed). A copy of sound-record is archived in Colección Nacional de Ornitología,  
12 Museo Argentino de Ciencias Naturales “Bernardino Rivadavia” (MACN), Buenos Aires  
13 (accession numbers: to be confirmed) and available on Xeno-canto (accession numbers: to  
14 be confirmed).

15 *Variation in the type series.*-The type series includes three specimens, all males, that  
16 share the same diagnostic morphological and vocalization characteristics. The specimen  
17 MACN-72855 has a more complete collar lacking of Cream Color feathers on the ventral  
18 side alike of the holotype MACN-72854. The specimen MACN-72856 has some feathers  
19 Dusky Brown in the posterior zone of the gray crown and the incomplete collar has a few  
20 feathers of Cream Color, less than holotype MACN-72854. The tail feathers in specimens  
21 MACN-72855 and MACN-72856 have the bases of the anterior and posterior vane in  
22 white.

1 *Etymology*.- The specific epithet is a latinized adjectival form referring to the species  
2 main range at the ecosystem of the Esteros del Iberá (Iberá's marshes) in the province of  
3 Corrientes, Argentina. "Iberá" is a term derivate from guaraní native language that means  
4 "glittering waters". Esteros del Iberá is a complex mosaic of lagoons, rivers, wet grasslands  
5 and subtropical forests with an extension of 14,000 km<sup>2</sup> and most of the area is protected as  
6 a Provincial Reserve, including private and government properties. By naming this species,  
7 we wish to draw attention for the conservation of the Esteros del Iberá as an remarkable  
8 reservoir of a rich cultural and natural diversity of our country.

9

10

#### REMARKS

11

12 *Morphology*.- Males of *S. iberaensis* are similar in plumage making it quite easy to  
13 identify this taxon, despite the fact that some individuals vary in the extension of the collar  
14 (Fig. 1). Our study of the specimens collected and our field observations on *S. iberaensis*  
15 indicate that there is a range of individual variation in the dark collar, which in some  
16 individuals appears as incomplete and in others it looks completely full. Such variability in  
17 the extent or intensity of the coloration is reported in males of other species of *Sporophila*  
18 (see Stiles 1996, Machado and Silveira 2011). We noted similar variation in plumage  
19 among males of other species of capuchinos in the field sightings in Corrientes.

20

21

22

23

We compared specimens of *S. iberaensis* with 133 museum specimens (males) of  
capuchinos of genus *Sporophila* from collecting sites in the provinces of NE Argentina at  
Museo Argentino de Ciencias Naturales "Bernardino Rivadavia" (MACN, Buenos Aires;  
Appendix 3). We found differences between the extension of the black throat and

1 differences in color of the throat and the ventral region of adult males of *S. ruficollis*.  
2 Similarly, we found a variation in the intensity of the ventral coloration in the series of  
3 specimens of adult males of *S. hypoxantha* and *S. hypochroma*, ranging from very light  
4 (cream and cinnamon) to very dark (rufous and marron). Such variability in intraspecific  
5 coloration means that most identifications in the field should be confirmed by their  
6 vocalizations.

7 Individuals of *S. iberaensis* were erroneously identified by A.S.D.G. as immature *S.*  
8 *ruficollis* during the field work prior to 2009. This is evident in the field notes of point  
9 counts; Table 2 compares the observed abundances of the capuchinos in a series of annual  
10 100m-radius point counts of birds in the grasslands of Esteros del Iberá made between  
11 2008 and 2011 (A.S.D.G.). The abundances of *S. ruficollis* for 2008 were overestimated  
12 due to the assignation of individuals with supposed immature appearance, but these actually  
13 belonged to *S. iberaensis*. Beginning in 2009, these birds were annotated as if they were  
14 another species on the basis of plumage and voice, and thus is evident that the annual  
15 counts had homogeneity in the rank of relative abundances of species between years 2009-  
16 2011.

17 Knowledge about the sequence of plumages in capuchinos is poorly documented in  
18 the literature; however it is important to compare available information regarding the  
19 differences between the maturation of the plumage of immature males of *S. ruficollis* and  
20 adult males *S. iberaensis*. An experiment carried out to study plumage molt of juvenile *S.*  
21 *ruficollis* extracted from their nests (1992 and 1993) and held in captivity for more than  
22 five years, found that immature males have blackish brown throats, but do not have a well

1 defined the gray crown (M.A. Roda *in litt.*). During the first year, male *S. ruficollis* exhibit  
2 similar coloration than females, requiring more than a year to acquire their final male adult  
3 plumage. From 9 months of age, these young males have uneven spots, asymmetrical, of  
4 the blackish brown in throat, and chestnut in the rest of the ventral, both with different  
5 degrees of intensity in color. They acquired gray dorsal coloration at the end of maturation,  
6 when they have completed their full adult plumage, that is, when also have acquired much  
7 of the adult pattern and black-and-rufous color in the ventral region. Other character which  
8 allows differentiating immature birds in *Sporophila* is the horny coloration of the bill with  
9 pale or yellowish color in the basis, in adults the bill is uniformly black. Such  
10 characteristics of immature males of *S. ruficollis* are observed in museum specimens with  
11 age determination (Fig. 4).

12       These observations on plumage maturation of *S. ruficollis* agree with recent studies  
13 made with the species *S. hypoxantha* under laboratory conditions that were measured  
14 objectively using reflectance spectrometry (Facchinetti et al. 2011). Such study found that  
15 males have a plumage similar to females during their first year (delayed plumage  
16 maturation). Males acquire typical plumage of an adult after a year of age, being the crown  
17 the latest patch acquiring gray coloration. Further studies of the plumage of *S. hypoxantha*  
18 indicate that the pigments involved in reddish and dark coloration are melanins  
19 (transmission electron microscopy, Facchinetti 2012), while the olive or gray coloration of  
20 the crown and dorsal parts would correspond to structural (not pigment) and whose  
21 function is often associated with signals of male competitiveness or social dominance (see  
22 Facchinetti et al. 2011).

1 Study of museum aged specimens of *S. cinnamomea* showed similar characteristics  
2 than observed in bill and plumage of *S. ruficollis* (Fig. 4).

3 In three cases, it is considered that the *S. ruficollis*, *S. hypoxantha* and *S.*  
4 *cinnamomea*, exhibit delayed plumage maturation, a frequent phenomena in other species  
5 that similarly forage in mixed flock during the nonbreeding season and are sexually  
6 dichromatic (Lyon and Montgomerie 1986, Beauchamp 2003).

7 Finally, in relation to plumage maturation in *S. iberaensis* we only observed two  
8 solitary individuals with female-like plumage, which vocalized and behaved like males,  
9 perching high and responding strongly to playback.

10 *Vocalizations.*- As the voices of the capuchinos are species-specific and are  
11 diagnostic (Areta 2008, Areta et al. 2011, Areta and Repenning 2011a), we performed a  
12 comparative analysis of the characteristics of the vocalizations of *S. iberaensis* with other  
13 capuchinos species found in the province of Corrientes, Argentina. Knowing that  
14 *Sporophila* males exhibit strong territoriality during the breeding season, we also performed  
15 simple playback experiments in the field to assess the response of individuals *S. iberaensis*  
16 to different songs. Because individuals were not marked, we only considered for analysis  
17 data territorial males that were separated by more than 1 km.

18 For the comparative analysis of vocalizations we followed the methodology of Areta  
19 (2008) Areta et al. (2011) and Areta and Repenning (2011a, 2011b) because this method  
20 made it possible to resolve the taxonomic status of other previously recognized species and  
21 the identification of color morphs and voice dialects belonging to well-defined species.  
22 During our field work, we recorded vocalizations of 27 individuals of *S. iberaensis* using



1 Zoom H4n and Edirol Roland Corporation recorders, with directional microphone  
2 Sennheiser ME-66 (copies of these sounds are deposited in MLNS, MACN and Xeno-  
3 Canto Archive, Appendix 4). We compared recordings of *S. iberaensis* with vocalizations  
4 of 101 individuals of seven capuchinos species (Appendix 4). We performed and examined  
5 spectrograms of the recordings using Syrinx 2.1 (John Burt, University of Washington). We  
6 characterized the notes that could be identified unambiguously in the songs of *S. iberaensis*  
7 on the basis of the distribution of the frequency and the relative position in the song despite  
8 variation among individuals (Fig. 2). We compared the introduction, main song and calls  
9 separately. We evaluated the occurrence of the each note in individuals of *S. iberaensis* and  
10 other capuchinos assuming they have the same general structure.

11 The introduction is composed of three basic types of notes (marked as  $\beta$ ,  $\gamma$  and  $\delta$  in  
12 Fig. 2A-E) that are combined alternating the order of appearance as shown in Figure 2F.  
13 We observed 25 different combinations in a total of 174 introductions and the five most  
14 frequent combinations representing 73% of all introductions are illustrated in Figure 2A-E.  
15 We did not find that any other species of capuchinos had the note shaped as an “Eiffel  
16 Tower” that is consistently present in the introductions of *S. iberaensis*. We consider this a  
17 diagnostic note of the species both considering our study of spectrograms of six species of  
18 capuchinos, and the spectrograms provided in the results of studies by Areta (2008), Areta  
19 et al. (2011), Areta and Repenning (2011a, 2011b) and Repenning et al. (2010).

20 For the main song of *S. iberaensis*, we identified 13 unambiguous notes, the first 6  
21 notes (Fig. 2G-J, with marks a, b, c, d, e, f) were always emitted in the same order of all  
22 full songs we analyzed (N = 48 from 11 individuals). The other following notes that occur  
23 after (Fig. 2G-J, with marks g, h, i, j, k, l and m) were emitted by altering the order in some

1 cases as shown in Figure 2. The diagnostic note (Fig. 2G-J with marks a, and 2K-L) is  
2 present at the beginning of the song. Compared to the homologous note in other species of  
3 capuchinos (Fig. 3I-VII, marked c), in *S. iberaensis* this note unique because of its long  
4 duration, vibrato, "nasal" type of sound and notoriety of the harmonics (Fig. 2K). The shape  
5 of this note was unchanged throughout all the songs we analyzed, and usually followed by  
6 two notes of similar form.

7 The two main calls *S. iberaensis* (Fig. 2M-N) are distinctive from other species such  
8 as *S. palustris*, *S. ruficollis*, *S. cinnamomea* and *S. hypoxantha* (Areta 2008, Areta et al.  
9 2011, Areta and Repenning 2011a, 2011b) (Fig. 3). In *S. iberaensis*, the main calls are  
10 characterized by a stable frequency distribution and dense at the top of the notes before its  
11 fall vertically, independently of their frequency range. The first main call (Figure 2M) is  
12 characteristic by presenting at the end of the note a termination in a "V" small similar to the  
13 "nail" that bends downward that is described for the main call of *S. palustris* in Areta  
14 (2008) (Fig. 3VD). We consider the main call *S. iberaensis* diagnostic among other  
15 capuchinos.

16 The notes of the introduction, main song and calls of all other species of capuchinos  
17 are clearly different, both observed in our comparison, as with the direct comparison with  
18 the characteristic spectrograms for capuchinos that other authors have published (see Areta  
19 2008, Repenning et al. 2010, Areta et al. 2011, Areta and Repenning 2011a, 2011b,  
20 Campagna et al. 2011). Note that in the introductions of other species (Figure 3I-VII), all  
21 notes have a frequency distribution almost vertical and descending in all cases, whereas in  
22 *S. iberaensis* these notes are ascending or stable, but mostly appears in the form of main

1 note with shape of “Eiffel Tower” with a significant frequency range both ascending and  
2 descending symmetrically. In comparison to the main song of the other species of  
3 capuchinos, none were identical to the notes identified in *S. iberensis* except for: 1) a note  
4 indicated by the letter i, which appears in the main song of *S. iberensis* (Fig. 2I-J, marked  
5 with ‘i’), *S. cinnamomea*, *S. hypoxantha*, and *S. melanogaster* (Figs. 3IIB, 3IIIB and  
6 3VIIB); 2) a note appears on the main song of *S. melanogaster* having a structure similar to  
7 diagnostic note of the main song of *S. iberensis* when it appears repeated in “bc” position  
8 (not ‘a’ position), as show the spectrogram of Figure 2G-J vs Figure 3VIIC; 3) a note  
9 corresponding to the typical call *S. iberensis* (Fig. 2N) resembles one of the notes of the  
10 introduction of *S. cinnamomea* (Fig. 3II, second note). In any case, the sequence of notes,  
11 the intensity of diagnostic notes and constancy of the voices of all the capuchinos analyzed  
12 is sufficient evidence of a distinctive vocal repertoire that is associated with individuals that  
13 have the characteristic plumage of *S. iberensis*.

14 During the breeding seasons of 2009, 2010 and 2011 we conducted field observations  
15 to ensure that individuals characterized as *S. iberensis* based on their plumage produced  
16 diagnostic vocalizations. We conducted playback experiments to 33 individuals with  
17 characteristic plumage of *S. iberensis*. When one individual was singing we recorded their  
18 vocalization to obtain a good record. If the bird was calm and accustomed to the presence  
19 of the observer, we played songs of other capuchinos (*S. ruficollis*, *S. cinnamomea*, *S.*  
20 *palustris*, *S. hypoxantha*, *S. hypochroma*, and *S. pileata*), and then observed the reaction of  
21 the individual. If there was no response to the playback of another species, we completed  
22 the experiment playing the voice of an *S. iberensis* recorded in 2009 and we assessed  
23 whether there was a response. We conducted this experiment to 22 individuals of *S.*

1 *iberaensis* and we obtained negative results for the stimulus of the songs of another species,  
2 and positive response for the song of *S. iberaensis*. For 12 individuals, we played voices of  
3 the six species of capuchinos, varying the order of appearance, and for the other 10  
4 individuals were reproduced voices of a single species (2 *S. palustris*, 5 *S. ruficollis*, 1 *S.*  
5 *hypochroma*, 1 *S. cinnamomea* y 1 *S. hypoxantha*). The positive response of the individuals  
6 to the voices of *S. iberaensis* was a sudden change in behavior, with quick changes of their  
7 perch, head movements, and strong approaches directly to the sound source. A further 11  
8 individuals were tested first with the voices of *S. iberaensis* and responded positively. On  
9 one occasion an individual with plumage of *S. iberaensis* did not react to the song of *S.*  
10 *ruficollis*, nor to the sing of *S. iberaensis*.

11 We also note that our playing *S. iberaensis* vocalizations in their more characteristic  
12 habitats attracted individuals of this species on 3 separate occasions. We had not detected  
13 these birds previously, meaning that these individuals were attracted by the recordings from  
14 large distances (> 100 m), but were not attracted by such recordings any other species of  
15 capuchinos that are usually in these same habitats. Additionally, we performed other six  
16 experiments reproducing playback voices from *S. iberaensis* to other species of capuchinos  
17 in the area. We did not get positive responses to these recordings, but when we made  
18 playback of the “correct” species the response was positive.

19 *Distribution and habitat.*- During the fieldwork in the province of Corrientes in NE of  
20 Argentina, in 2001 and 2008-2011, we obtained a total of 81 records of *S. iberaensis* in 10  
21 localities along Esteros de Iberá a quasi pristine region with a very low human population,  
22 as it has not suffered negative impacts from superficial inflow from water courses nor

1 industrial activities in its borders (Fig. 5). Esteros del Iberá is one of the largest isolated  
2 inland freshwater wetlands located in South America, covering approximately 14,000 km<sup>2</sup>.  
3 It is a flat ecosystem with a very gradual general slope with extreme altitude around 72 m  
4 a.s.l. at the northeast and 50 m a.s.l. to the southwest. The Iberá wetland consists of a vast  
5 mosaic of marshes, swamps and shallow lakes, most of which (60%) remain permanently  
6 inundated. Characteristic mats of floating vegetation called “embalsados” compose the  
7 shores and the surrounding environment of the lakes. The oriental region is characterized  
8 by a slow sheet flow where the biggest permanent shallow lakes are located in connection  
9 with the contiguous marshland. The central-western region, where *S. iberaensis* is more  
10 abundant, is characterized by an irregular topography which tends to form a plain and semi-  
11 fluvial drainage network of interconnected streams which collect the waters, and where  
12 emerging sandy hills conforming “islands” covered by grasslands and savannas (Fig. 6A).  
13 According to the flooding regime there are different types of habitats in Iberá which occur  
14 from the open water bodies to the “islands” where the terrain slightly rises and allows the  
15 development of terrestrial vegetation of grasslands and forests (Neiff 1981).

16 *S. iberaensis* inhabits wet tall-grasslands around vegetated marshes in the ecorregion  
17 of Esteros del Iberá. Such lowland grasslands are usually dominated by tall grasses such as  
18 *Paspalum durifolium* and *Andropogon lateralis* which produce seeds that are the main food  
19 of the capuchinos. These grasslands can be temporary flooded. A similar type of habitat is  
20 artificially created in Corrientes because of drainage channels or by retention of water  
21 along the roads. This is the reason that several records of *S. iberaensis* and another  
22 capuchinos are quite common along the roads. We found some territories of *S. iberaensis*  
23 very close to the water in the border of marshes with permanent water and covered of dense

1 emerging aquatic plants of genus *Rhynchospora*, *Thalia*, *Panicum*, *Cyperus* and  
2 *Hymenachme*. Additionally B.L.L. observed three territorial males in the Aguapey River  
3 Basin during 2011, in an area of flood plains on sandy soil covered of grassland dominated  
4 by *Paspalum rufum*, similar to the physiognomy of the wet grasslands on sandy soils in the  
5 western Esteros del Iberá. No records of *S. iberaensis* are from more dry grasslands or  
6 savannas.

7 We obtained a set of additional 21 records through consultation with colleagues and  
8 bird photographers who had posted in Internet photos or recordings of *S. iberaensis* that  
9 were labeled as belonging to 'young' or 'immature' *S. ruficollis* (see Appendix 2). This set of  
10 photographic and voice records which may be assigned to *S. iberaensis* includes 15 records  
11 that fall exactly within of the 10 localities we studied in the province of Corrientes in  
12 Argentina, but it also includes six records that can expand the geographical distribution to  
13 three localities in Paraguay (San Cosme y Damián, department of Itapua; Bajo Chaco,  
14 department of Presidente Hayes; and Arroyo y Esteros, department of Cordillera) and one  
15 in Brazil (Aquidauana, state of Mato Grosso do Sul) (see Appendix 2, Fig. 5). For one  
16 photographic record obtained in Paraguay we did not achieve the exact location.

17 All localities for *S. iberaensis* are within the known geographical range of the group  
18 of southern capuchinos which occur sympatrically (see maps in Ridgely and Tudor 1989,  
19 Da Silva 1999, Campagna et al. 2011). However, in the case of *S. iberaensis*, to our  
20 knowledge, it seems to have a much more restricted geographical range in the province of  
21 Corrientes in Argentina, continuing northwards through the valley of the River Paraguay in  
22 Paraguay and Brazil.

1 Capuchinos are austral migratory birds that regularly breed in northern Argentina,  
2 Paraguay, Uruguay and southeastern Brasil, and migrate northwards in winter to central  
3 Brazil and Eastern Bolivia (Ridgely and Tudor 1989). Some capuchinos such as *S.*  
4 *hypoxantha* are partially migratory and maintain individuals during the winter in Formosa,  
5 in north Argentina (Di Giacomo 2005). To our knowledge records of *S. iberaensis* are from  
6 the breeding season with October 6 and March 11 as extreme dates, with no records during  
7 winter in Esteros del Iberá, thus the distributional range of this species during winter  
8 remain unknown.

9 *Ecology and behavior.- S. iberaensis* is a common species in its typical habitat in  
10 Esteros el Iberá. Like most of capuchinos that inhabit the region, we found *S. iberaensis* in  
11 wet or seasonally flooded grasslands that are dominated by large grasses with high vertical  
12 development and presence of many seeds in the spikes. We observed *S. iberaensis* eating  
13 the seeds of several grasses: *Andropogon lateralis*, *Paspalum durifolium*, *Paspalum rufum*,  
14 and *Hymenachme* sp. The seeds are consumed directly from the spikes; they do not eat the  
15 seed that fall on the ground. We observed *S. iberaensis* on two occasions eating fresh and  
16 green seeds from the spikes of *Hymenachme* sp. in February 2011 in Estancia San Nicolás,  
17 at the end of the summer when there are few seeds of *Paspalum* in the grasslands. One of  
18 the specimens of *S. iberaensis* that we collected in Estancia Alonso had green seeds of  
19 *Hymenachme* throughout its digestive tract.

20 During the breeding season males of capuchinos are usually on high perches of the  
21 grassland, and are very conspicuous and vocalizing much of the time. However, females are  
22 always hidden and fly lower, among the grasses. The males are very territorial, both to the  
23 intrusion of their territory by other capuchino of the same species or other species, and also

1 to the playback of conspecific voices. In spite of high territoriality, in Corrientes it is  
2 common to find several species of capuchinos in the same site, even in the breeding season,  
3 where territories are contiguous but are mutually exclusive (A.S. Di Giacomo unpublished  
4 information). Thus, the fights are common among males defending contiguous territories.

5 We estimated the relative abundance of all sympatric capuchinos during the annual  
6 series of 100m-radius point counts of grassland birds in Esteros del Ibera. While the  
7 relative abundances of capuchinos varied between years, *S. iberensis* always presented a  
8 high abundance relative to the other seedeaters (Table 2). Moreover, in some places of  
9 Estancia San Nicolás, Cambyretá and Carambola, in the region of sandy hills in central-  
10 western Esteros del Iberá, *S. iberensis* seems to be the most abundant species.

11 We observed a pair of *S. iberensis* feeding two fledglings in San Nicolás in February  
12 2011. We also observed a female visiting a nest in a tall grass at the edge of a deep marsh  
13 in the territory of a male *S. iberensis*, in November 2011. These data confirm that the  
14 species breeds in these habitats and during the same period as the other species of  
15 capuchinos. Additionally, the three males we collected showed active testes.

16 *Systematics and biogeography.*- Southern capuchinos show an extraordinary variation  
17 in phenotype (plumage and song) despite very low levels of genetic differentiation found  
18 in any of the genetic markers assayed (Lijtmaer et al. 2004, Campagna et al. 2009,  
19 Campagna et al. 2011). Similar to the Darwin's Ground Finches (Freeland et al. 1999), the  
20 southern capuchinos could not be diagnosed using neutral markers despite extremely  
21 phenotypic differentiation. Recent studies on demographic expansions and gene flow  
22 between some of the species of southern capuchinos suggest a rapid, recent and ongoing



1 continental radiation of the clade, with species diverging in male plumage coloration  
2 patterns and song (Campagna et al. 2011). According to the current practice of recognizing  
3 multiple species of southern capuchinos on the basis of plumage, song and reproductive  
4 habitat variation (Rigdelly and Tudor 1989, Areta 2008, Areta et al. 2011, Areta and  
5 Repenning 2011a, 2011b, Campagna et al. 2011), *S. iberaensis* has a diagnosable plumage,  
6 song, and typical habitat for reproduction, including conspicuous territoriality of males with  
7 aggressive response to playback with conspecific song and ignoring the heterospecific  
8 song, which would support the existence of ongoing reproductive isolation.

9         Southern capuchinos are listed as ‘obligate’ grassland birds of the open habitats of  
10 South America, inhabiting savannas, grasslands and marshes in Cerrado, Beni, Pantanal,  
11 Chaco and Pampas ecosystems (Vickery et al. 1999), and reproductive areas of southern  
12 capuchinos are broadly overlapped with six species occurring in Esteros del Iberá, province  
13 of Corrientes, NE Argentina (Birdlife International 2012). Two other species of southern  
14 capuchinos do not inhabit in Argentina: *S. melanogaster* inhabits grasslands of altitude  
15 (700-1800 m a.s.l.) in coastal SE Brazil and *S. nigrorufa* restricted to savannas in SE  
16 Bolivia and Brazilian Pantanal. The reproductive area of *S. iberaensis* is centered in NE  
17 Argentina within the range of all currently recognized species of southern capuchinos,  
18 probably sharing the same evolutionary and biogeography history together all southern  
19 capuchinos, which require further studies to understand the decoupling between genetic and  
20 phenotypic traits involving new approaches such as field experiments on behavior and next-  
21 generation sequencing as suggested by Campagna et al. (2011).

22         Paleogeographically, Esteros del Iberá is a plain depression which constitutes the  
23 ancient bed of the Paraná River, and remained connected until the end of the Pleistocene

1 when a geological uplifting of the eastern border of Esteros del Iberá occurred and the  
2 Paraná River moved towards the west to form the present riverbed (Neiff 1999). This  
3 displacement generated diverse wetlands from the floodplains associated to the displaced  
4 watercourses. From the end of Pleistocene the Iberá basin has been closed, mainly fed by  
5 rain and drains only towards the Middle Paraná through Corriente River in the south of the  
6 wetland (Fig. 5). In Esteros del Iberá, where *S. iberaensis* apparently has their unique  
7 breeding population, there are other endemic taxa such as a frog (*Argenteohyla siemersi*  
8 *pedersenii*), two lizards (*Anisolepis longicauda* and *Liolaemus azarai*), three fishes  
9 (*Astyanax pynandi*, *Hyphessobrycon auca*, and *Trichomycterus johnsoni*) and six species of  
10 endemic plants (*Oxipetalum fontelae*, *Bernardia asplundii*, *Jatropha pedersenii*, *Portulaca*  
11 *meyeri*, *Picrosia cabreriana*, *Elatine lorentziana*) (Parera 2004). More recently, researchers  
12 have described an independent evolutionary lineage of tuco-tucos (small subterranean  
13 rodents of the genus *Ctenomys*) that inhabits sandy soils of the Esteros del Iberá (Caraballo  
14 et al. 2012, Gómez Fernández et al. 2012), in the same areas where was recorded *S.*  
15 *iberaensis*.

16 *Conservation.*- Two species of capuchinos of genus *Sporophila* are globally  
17 threatened (Birdlife International 2012): *S. palustris* (Endangered) and *S. cinnamomea*  
18 (Vulnerable), and two other are considered as Near Threatened (*S. ruficollis* and *S.*  
19 *hypochroma*). Main threats for capuchinos are habitat loss by conversion of natural  
20 grasslands to agriculture and forestation, and bird trapping. For such species the criteria to  
21 categorizing them as globally threatened is based on inferred or suspected population size  
22 reduction of  $\geq 30\%$  over the 10 years through decline of habitat or the level of exploitation,

1 and decreasing population size under 10,000 mature individuals. All these globally  
2 threatened species have breeding populations in Corrientes, Argentina, mainly in Esteros  
3 del Iberá where there are seven Important Bird Areas identified under Birdlife International  
4 criteria (Di Giacomo 2005b). These species of threatened capuchinos also have breeding  
5 populations in other regions of Argentina (provinces of Entre Ríos, Santa Fe and Buenos  
6 Aires), SE Brazil (state of Rio Grande do Sul), SE and W Uruguay, SE Paraguay and a  
7 disjoint population of *S. hypochroma* is located E Bolivia (see Birdlife International 2012).  
8 To our knowledge the only breeding population of *Sporophila iberaensis* appears to be  
9 restricted to Esteros del Iberá and neighboring grasslands in Corrientes where the same  
10 threats exist for the other species of capuchinos. In terms of criteria for evaluating the  
11 conservation status of *Sporophila iberaensis*, the extent of occurrence in Corrientes can be  
12 estimated in less than 20,000 km<sup>2</sup> and such subpopulation is estimating to contain no more  
13 than 1,000 mature individuals, which this species qualifies for the category of globally  
14 “Vulnerable” under the following IUCN Red List Criteria (IUCN 2001): A3cde+4cde;  
15 B1ab(i,ii,iii,iv); C2a(i). *S. palustris*, which has a much larger geographical distribution  
16 during the breeding season that *S. iberaensis*, including NE Argentina (provinces of  
17 Corrientes and Entre Rios), S. Paraguay, Uruguay and SE Brazil (Rio Grande do Sul) has  
18 been classified as "Endangered". We suggest that until new population estimates are made  
19 for the capuchinos, it is important to categorize *S. iberaensis* at least as “Vulnerable”, both  
20 as a precaution as fit under the above IUCN criteria. Also, considering *S. iberaensis* as a  
21 threatened species that migrates to the grasslands of Paraguay and Brazil, it should also be  
22 included together other capuchinos in Appendix I of the Convention on Migratory Species

1 where exist a Memorandum of Understanding (MoU) between Argentina, Brazil, Paraguay  
2 and Uruguay targeting Southern South American grassland birds (Azpiroz et al. 2012).

3 Most records of *S. iberaensis* in the province of Corrientes have been made within the  
4 Iberá Natural Reserve, a provincial reserve which has a core conservation area on public  
5 land complemented with a ring of private land. The public land area is mostly composed of  
6 large marshes, ponds and large seasonally flooded areas (about 700,000 hectares), which  
7 are not used for any productive activities. Surrounding this depression, the ring of private  
8 land areas is located in mainland and in the edges of the marshes that are occupied by large  
9 areas of grasslands devoted to cattle, afforestation and conservation (about 500,000  
10 hectares). We recorded most *S. iberaensis* in the areas of mainland and edges of marshes  
11 dedicated to conservation (about 150,000 hectares belonging to an NGO The Conservation  
12 Land Trust). Today, private reserves bordering Iberá Natural Reserve represent a key area  
13 for the conservation of this species because it is the only known breeding area.

14

15

#### ACKNOWLEDGMENTS

16

17 The present study was conducted under Bird Habitat Division of USFWS (NMBCA  
18 5115 and 4544) and BBVA Foundation (Iberaqua - BIOCON-04-100/05 Project) sponsored  
19 research. A.S.D.G. and C.K. are Research Fellow of CONICET. A.S.D.G. work was also  
20 supported by CONICET (PIP-114-201101-00329) and C.K. was also supported by IDRC  
21 (iBOL, International Barcode of Life Project). We also thank Dirección de Parques y  
22 Reservas de la Provincia de Corrientes and The Conservation Land Trust for allowing us to

1 conduct this study at Reserva Natural del Iberá, and Dirección de Recursos Naturales  
2 (Fauna) for authorizing study and capture permits (Santiago Faisal, Marcelo Beccaceci,  
3 Bernardo Holman and Jorge Silva Core). We are grateful for logistical support and  
4 companion during fieldwork to Alejandro Di Giacomo, Ariel Ocampo, Sofía Heinonen,  
5 Ignacio Jimenez Perez, Sebastian Cirignoli, Yamil Di Blanco, Karina Spoerring, Ricardo  
6 Quintana, Fernando Sosa, Carlos ‘Yuyito’ Figuerero, Anibal Parera, Pascual Perez, Malena  
7 Srur, Marisi Lopez, Adrián Galimberti, Alexander Keshel, Mauricio Losada, Miranda  
8 Collett, Familia Steed and Patricia Haynes. We thank Miguel Angel Roda and Miguel Ferro  
9 for providing unpublished results of the experiments on plumages of *Sporophila*, Alejandro  
10 Di Giacomo and Amalia Suarez for identifying plant species, Pablo Tubaro and Yolanda  
11 Davies for providing access and assistance to the MACN collection, and Peter Vickery for  
12 reviewing and editing this manuscript. As admirable as a person and as an artist, we want to  
13 specially thank Aldo Chiappe his beautiful painting of the new capuchino species. This  
14 paper is dedicated to the memory of Don José Antonio Ansola (“Che Patrón”) one of the  
15 last authentic ‘gauchos’ of the Esteros del Iberá who managed his lands in a traditional  
16 way, keeping all the native culture and rich biodiversity intact, so that we can enjoy it in the  
17 future. Also is dedicated to the mentors of The Conservation Land Trust, Douglas and  
18 Kristine Tompkins, who have established these same lands in strict conservation reserves  
19 and are working to recover populations of the most endangered species of the region.

20

21

#### LITERATURE CITED

22

- 1    ARETA, J. I. 2008. The Entre Ríos Seedeater (*Sporophila zelichi*): a species that never was.  
2            Journal of Field Ornithology 79:352–363.
- 3    ARETA, J. I., J. I. NORIEGA, L. PAGANO, AND I. ROESLER. 2011. Unraveling the ecological  
4            radiation of the capuchinos: Systematics of Dark-throated Seedeater *Sporophila*  
5            *ruficollis* and description of a new dark-collared form. Bulletin of the British  
6            Ornithologists’ Club 131:4–23.
- 7    ARETA, J. I. 2009. Pedomorphosis in *Sporophila* seedeaters. Bulletin of the British  
8            Ornithologists’ Club 129:98-103.
- 9    ARETA, J. I., AND M. E. REPENNING. 2011a. Systematics of the Tawny-bellied Seedeater  
10           (*Sporophila hypoxantha*). I. Geographic variation, ecology, and evolution of  
11           vocalizations. Condor 113:664-677.
- 12   ARETA, J. I., AND M. E. REPENNING. 2011b. Systematics of the Tawny-bellied Seedeater  
13           (*Sporophila hypoxantha*). II. Taxonomy and evolutionary implications of the  
14           existence of a new tawny morph. Condor 113:678-690.
- 15   AZPIROZ, A. B., J. P. ISACCH, R. A. DIAS, A. S. DI GIACOMO, C. S. FONTANA, AND C. M.  
16           PALAREA. 2012. Ecology and conservation of grassland birds in southeastern South  
17           America: a review. Journal of Field Ornithology 83:217–246.
- 18   BALDWIN, S., H. OBERHOLSER, AND L. WORLEY. 1931. Measurements of birds. Scientific  
19           Publications of the Cleveland Museum of Natural History 2:1–165.
- 20   BEAUCHAMP, G. 2003. Delayed plumage maturation in birds in relation to social foraging  
21           and breeding competition. Evolutionary Ecology Research 5:589–596.

- 1 BENITES P., M. D. EATON, D. A. LIJMAER, S. C. LOUGHEED, AND P. L. TUBARO. 2010. Analysis  
2 from avian visual perspective reveals plumage colour differences among females of  
3 capuchino seedeaters (*Sporophila*). *Journal of Avian Biology* 41:597–602.
- 4 BIRDLIFE INTERNATIONAL. 2012. Threatened Birds of the World. Species Factsheets.  
5 [Online.] Available at <http://www.birdlife.org/datazone/species>.
- 6 CAMPAGNA, L., D. LIJMAER, K. C. KERR, A. BARREIRA, P. D. N. HEBERT, S. C. LOUGHEED,  
7 AND P. L. TUBARO. 2009. DNA barcodes provide new evidence of a recent radiation  
8 in the genus *Sporophila* (Aves: Passeriformes). *Molecular Ecology Resources*  
9 10:449–458.
- 10 CAMPAGNA, L., P. BENITES, S. C. LOUGHEED, D. A. LIJMAER, A. S. DI GIACOMO, M. D.  
11 EATON, AND P. L. TUBARO. 2012. Rapid phenotypic evolution during incipient  
12 speciation in a continental avian radiation. *Proceedings of the Royal Society of*  
13 *London, Series B* 279:1847-1856.
- 14 CARABALLO, D. A., G. A. ABRUZZESE, AND S. ROSSI. 2012. Diversity of tuco tucos  
15 (*Ctenomys*, Rodentia) in the Northeastern wetlands from Argentina: mitochondrial  
16 phylogeny and chromosomal evolution. *Genetica* 140:125-136.
- 17 CARNEVALI, R. 1994. Fitogeografía de la Provincia de Corrientes. INTA and Gobierno de  
18 la Provincia de Corrientes, Corrientes, Argentina.
- 19 DEVENISH, C., D. F. DÍAZ FERNÁNDEZ, R. P. CLAY, I. DAVIDSON, AND I. YÉPEZ ZABALA.  
20 2009. Important Bird Areas Americas – Priority Sites for Biodiversity Conservation.  
21 BirdLife International, Quito, Ecuador.
- 22 DI GIACOMO, A. G. 2005a. Aves de la Reserva El Bagual, Pages 201–465 *in* Historia  
23 Natural y Paisaje de la Reserva El Bagual, Provincia de Formosa, Argentina.

- 1        Inventario de Fauna de Vertebrados y de la Flora Vascul ar de un Área Protegida del  
2        Chaco Húmedo (A. G. Di Giacomo, and S. F. Krapovickas, Eds.). Aves  
3        Argentinas/Asociación Ornitológica del Plata, Buenos Aires, Argentina.
- 4    DI GIACOMO, A. S. 2005b. Áreas Importantes para la Conservación de las Aves en la  
5        Argentina. Sitios Prioritarios para la Conservación de la Biodiversidad. Aves  
6        Argentinas / Asociación Ornitológica del Plata, Buenos Aires, Argentina.
- 7    DI GIACOMO, A. S., P. VICKERY, H. CASAÑAS, O. SPITZNAGEL, C. OSTROSKY, S.  
8        KRAPOVICKAS, AND A. BOSSO. 2010. Landscape associations of globally threatened  
9        grassland birds in the Aguapey River Important Bird Area, Corrientes, Argentina.  
10       Bird Conservation International 20:62–73.
- 11   FACHINETTI, C. 2012. Coloración del plumaje, sistema de apareamiento y elección de pareja  
12       en el Capuchino Canela (*Sporophila hypoxantha*). Ph. D. dissertation, Universidad de  
13       Buenos Aires, Buenos Aires, Argentina.
- 14   FACCHINETTI, C., A. G. DI GIACOMO, AND J. C. REBORDA. 2008. Parental care in Tawny-  
15       bellied (*Sporophila hypoxantha*) and Rusty-collared (*S. collaris*) Seedeaters. Wilson  
16       Journal of Ornithology 120:879-883.
- 17   FACCHINETTI, C., B. MAHLER, A. G. DI GIACOMO, AND J. C. REBORDA. 2011. Maturation  
18       of the Tawny-bellied Seedeater: Evidence of delayed plumage maturation and cryptic  
19       differentiation between juveniles and females. Condor 113:907-914.
- 20   FREELAND, J. R., AND P. T. BOAG. 1999. The mitochondrial and nuclear genetic  
21       homogeneity of the phenotypically diverse Darwin’s ground finches. Evolution  
22       53:1553–1563.



- 1 GÓMEZ FERNÁNDEZ, J., O. GAGGIOTTI, AND P. MIROL. 2012. The evolution of a highly  
2 speciose group in a changing environment: are we witnessing speciation in the Ibera  
3 wetlands? *Molecular Ecology* 21:3266-3282.
- 4 IUCN. 2001. IUCN Red List Categories and Criteria, version 3.1. IUCN Species Survival  
5 Commission. IUCN, Gland, Switzerland, and Cambridge, United Kingdom.
- 6 LIJTMAR, D. A., N. M. M. SHARPE, P. L. TUBARO, AND S. C. LOUGHEED. 2004. Molecular  
7 phylogenetics and diversification of the genus *Sporophila* (Aves: Passeriformes).  
8 *Molecular Phylogenetics and Evolution* 33:562–579.
- 9 LÓPEZ-LANUS, B. M. 2008. Sonidos de Aves del Cono Sur/ Bird Songs from Southern  
10 South America. Audiornis, Buenos Aires, Argentina.
- 11 LYON, B. E., AND R. D. MONTGOMERIE. 1986. Delayed plumage maturation in passerine  
12 birds: reliable signalling by subordinate males? *Evolution* 40:605–615.
- 13 MACHADO, E., AND L. F. SILVEIRA. 2011. Plumage variability and taxonomy of the Capped  
14 Seedeater *Sporophila bouvreuil* (Passeriformes: Emberizidae). *Zootaxa* 2781:49-62.
- 15 NAROSKY, T., AND D. YZURIETA. 1987. Guía para la Identificación de las Aves de  
16 Argentina y Uruguay. Vazquez Mazzini Editores, Buenos Aires, Argentina.
- 17 NEIFF, J. J. 1981. Tipificación de los ambientes acuáticos y de interfase del macrosistema  
18 Iberá. Pages 14-43 *in* Estudio del Macrosistema Iberá (A. A. Bonetto, Ed.). ICA-  
19 CECOAL, Corrientes, Argentina.
- 20 NEIFF, J. J. 1999. El régimen de pulsos en ríos y grandes humedales de Sudamérica. Pages  
21 97–146 *in* Tópicos sobre Humedales Subtropicales y Templados de Sudamérica (A. I.  
22 Malvarez, Ed.). UNESCO-ORCYT-MAB, Montevideo, Uruguay.

- 1 PARERA, A. 2004. Fauna de Iberá: Composición, Estado de Conservación y Propuestas de  
2 Manejo. Fundación Biodiversidad Argentina, Buenos Aires, Argentina.
- 3 REPENNING, M., C. E. ROVEDDER, AND C. S. FONTANA. 2010. Another color morph of  
4 *Sporophila* seedeater from *capuchinos* group (Aves—Emberizidae). Iheringia, Série  
5 Zoologia 100:369–378.
- 6 RIDGELY, R. S., AND G. TUDOR. 1989. The Birds of South America, Vol. 1. University of  
7 Texas Press, Austin, TX.
- 8 SMITHE, F.B. 1975. Naturalist's Color Guide: Part I, The Color Guide. American Museum  
9 of Natural History, New York.
- 10 SILVA, J. M. C. 1999. Seasonal movements and conservation of seedeaters of the genus  
11 *Sporophila* in South America. Studies in Avian Biology 19:272–280.
- 12 STATTERSFIELD, A. J., M. J. CROSBY, A. J. LONG, AND D. C. WEGE. 1998. Endemic Bird  
13 Areas of the World. Birdlife International. Cambridge, U.K
- 14 STILES, G. 1996. When black plus white equals gray: The nature of variation in the Variable  
15 Seedeater complex (Emberizinae: *Sporophila*). Ornitología Neotropical 7:75-107.
- 16 STRANECK, R. 1990. Canto de las aves de los esteros y palmares. Ediciones L.O.L.A.,  
17 Buenos Aires, Argentina.
- 18 VICKERY, P. D., P. L. TUBARO, J. M. C. DA SILVA, B. G. PETERJOHN, J. R. HERKERT, AND R.  
19 B. CAVALCANTI. 1999. Conservation of grassland birds in the Western Hemisphere.  
20 Studies in Avian Biology 19:2–26.

1 TABLE 1. Morphological measurements of *Sporophila cinnamomea*, *S. hypochroma*, *S. hypoxantha*, *S. iberaensis* sp. nov., *S. palustris*,  
2 *S. pileata* and *S. ruficollis* based on specimens listed in Appendix 3. Values are (in mm) mean  $\pm$  SE with range and sample size  
3 between parentheses. Measurements of specimens were taken by A. S. D. G. following Baldwin et al. (1931). Bill length (exposed  
4 culmen) and tarsus were measured to the nearest 0.1 mm with calipers, and chord wing and tail length were measured with a metal  
5 ruler to the nearest 0.5 mm.

| Species              | Bill length                      | Wing chord                          | Tail length                         | Tarsus length                       |
|----------------------|----------------------------------|-------------------------------------|-------------------------------------|-------------------------------------|
| <i>S. cinnamomea</i> | 8.26 $\pm$ 0.18 (7.8-8.7, n= 5)  | 52.20 $\pm$ 0.66 (50.0-54.0, n= 5)  | 36.50 $\pm$ 0.45 (35.0-37.0, n= 5)  | 13.80 $\pm$ 0.25 (13.0-14.5, n= 5)  |
| <i>S. hypochroma</i> | 7.98 $\pm$ 0.10 (7.4-8.2, n= 25) | 54.55 $\pm$ 0.65 (51.0-58.0, n= 25) | 37.11 $\pm$ 0.48 (35.0-40.0, n= 25) | 14.00 $\pm$ 0.17 (13.5-15.0, n= 25) |
| <i>S. hypoxantha</i> | 8.17 $\pm$ 0.07 (7.8-8.5, n= 30) | 53.82 $\pm$ 0.55 (51.0-57.0, n= 30) | 37.30 $\pm$ 0.37 (36.0-39.0, n= 30) | 13.72 $\pm$ 0.19 (13.0-15.0, n= 30) |
| <i>S. iberaensis</i> | 8.1 $\pm$ 0.0 (8.1-8.1, n= 3)    | 52.33 $\pm$ 0.88 (51.0-54.0, n= 3)  | 40.5 $\pm$ 0.5 (40.0-41.0, n= 2)    | 13.33 $\pm$ 0.33 (13.0-14.0, n= 3)  |
| <i>S. palustris</i>  | 8.30 $\pm$ 0.26 (7.8-8.7, n= 3)  | 55.25 $\pm$ 0.25 (55.0-56.0, n= 4)  | 36.50 $\pm$ 0.29 (36.0-37.0, n= 4)  | 12.83 $\pm$ 0.44 (12.0-13.5, n= 4)  |
| <i>S. pileata</i>    | 8.54 $\pm$ 0.09 (8.1-9.1, n= 14) | 53.97 $\pm$ 0.31 (52.0-56.0, n= 15) | 36.93 $\pm$ 0.44 (34.0-40.0, n= 15) | 13.70 $\pm$ 0.18 (12.5-15.0, n= 15) |
| <i>S. ruficollis</i> | 8.12 $\pm$ 0.07 (7.6-8.8, n= 54) | 54.62 $\pm$ 0.25 (53.0-57.0, n= 52) | 37.53 $\pm$ 0.34 (35.0-40.0, n= 53) | 13.56 $\pm$ 0.19 (12.5-15.0, n= 51) |

1 TABLE 2. Annual variation in relative abundance (individual/point count), frequency (% of  
2 occurrence on total point counts) and rank order (order in relative importance of the species  
3 in the annual counts) of *Sporophila cinnamomea*, *S. hypochroma*, *S. hypoxantha*, *S.*  
4 *iberaensis* sp. nov., *S. palustris*, *S. pileata* and *S. ruficollis* based on repeated 100m-radius  
5 points counts during the breeding seasons (November and December) of 2008, 2009, 2010  
6 and 2011.

7

| Species              | 2008<br>(n=115) | 2009<br>(n=126) | 2010<br>(n=104) | 2011<br>(n=83) |
|----------------------|-----------------|-----------------|-----------------|----------------|
| <i>S. cinnamomea</i> | 0.08 (4%, 4)    | 0.06 (2%, 4)    | 0.08 (6%, 5)    | 0.08 (6%, 4)   |
| <i>S. hypochroma</i> | 0.03 (2%, 6)    | 0.01 (1%, 7)    | 0.15 (8%, 3)    | 0.02 (2%, 5)   |
| <i>S. hypoxantha</i> | 0.36 (17%, 1)   | 0.09 (7%, 2)    | 0.36 (21%, 1)   | 0.17 (13%, 2)  |
| <i>S. iberaensis</i> | -               | 0.06 (5%, 3)    | 0.27 (15%, 2)   | 0.26 (15%, 1)  |
| <i>S. palustris</i>  | 0.04 (3%, 5)    | 0.06 (3%, 5)    | 0.06 (3%, 6)    | 0.10 (6%, 3)   |
| <i>S. pileata</i>    | 0.10 (5%, 3)    | 0.13 (5%, 1)    | 0.15 (6%, 4)    | 0.02 (2%, 6)   |
| <i>S. ruficollis</i> | 0.15 (7%, 2)    | 0.02 (1%, 6)    | 0.06 (3%, 7)    | 0.01 (1%, 7)   |

8

9

10

FIGURE LEGENDS

1  
2  
3  
4  
5  
6  
7  
8  
9  
10  
11  
12  
13  
14  
15  
16  
17  
18  
19  
20  
21  
22  
23  
24

FIG. 1. Plumage patterns of males Iberá's Seedeater *Sporophila iberaensis* sp. nov. and their habitat in Esteros del Iberá, Corrientes, Argentina. Top left: An individual with incomplete collar. Top right: An individual with incipient dorsal collar and a detail of the grass *Paspalum rufum* whose seeds are eaten for seedeaters. Bottom left: An individual with full collar and fresh plumage at the beginning of the breeding season, and a detail of the grass *Andropogon lateralis*, the dominant plant of the Ibera's grasslands. Bottom right: individual with full collar but with worn plumage as observed towards the end of the breeding season (based on holotype MACN-72854). Background: Typical habitat of *S. iberaensis* with wet grasslands dominated by *Andropogon lateralis* and *Paspalum* sp. around a marsh. Original painting by Aldo Chiappe.

FIG. 2. Representative audiospectrograms of vocalizations of *Sporophila iberaensis* sp. nov.: A-E, types of combination of notes ( $\beta$ ,  $\gamma$ ,  $\delta$ ) in introductions represented with more frequency in the samples. F, combination of notes in other introductions recorded less frequently. G-K, representative main songs and combination of notes (a, b, c, e, f, g, h, i, j, k, l, m, n). L, detail of the principal note in the main songs. M-N, main calls. A, C, D, E, G, K, L and M, recorded by B.L.L. from holotype MACN-72854 (Estancia San Alonso, Concepción, Corrientes, Argentina, 19 February 2011). B and I, H, and J recorded by B.L.L. from other three different individuals (Estancia San Alonso, Concepción, Corrientes, Argentina, 27-28 December 2010 and 20 February 2011). K, recorded by A.S.D.G. (Cambyretá, Ituzaingó, 11 November 2009).

1 FIG. 3. Representative audiospectrograms of vocalizations of other species of capuchinos  
2 (*Sporophila* sp.): I, *S. ruficollis*. II, *S. cinnamomea*. III, *S. hypoxantha*. IV, *S. hypochroma*.  
3 V, *S. palustris*. VI, *S. pileata*. VII, *S. melanogaster*. For each species is represented: A  
4 introduction, B main song, C detail of the diagnostic note in the main song, D main call  
5 (only for *S. ruficollis*, *S. cinnamomea* and *S. palustris* because they were identified as  
6 diagnostic by Areta 2008 and Areta et al. 2011). Records: I, *S. ruficollis* from Puente  
7 Barral, partido 25 de Mayo, Buenos Aires, Argentina, 4 February 2006 (López-Lanús  
8 2008); II, *Sporophila cinnamomea* from Estancia Las Cruces (a, b,c), Gualeguaychú, Entre  
9 Ríos, Argentina, 2 December 2001 (López-Lanús 2008) and Ceibas (d), Entre Ríos,  
10 Argentina, 18 December 2000 (S. Wasylyk en López-Lanús 2008); III, *Sporophila*  
11 *hypoxantha* from Cruce al Puente Fray Bentos, Gualeguaychú, Entre Ríos, Argentina, 3  
12 December 2001 (López-Lanús 2008); IV, *Sporophila hypochroma* from San Javier, Santa  
13 Fe, Argentina, 30 November 2004 (López-Lanús 2008); V, *Sporophila palustris* from  
14 Estancia El Potrero (a, b, c), Gualeguaychú, Entre Ríos, Argentina, 27 November 2008 (B.  
15 L. L.) and Estancia Santa Isabel (d), Alvear, Corrientes, Argentina, 4 December 2003 (R.  
16 Fraga en López-Lanús 2008); VI, *Sporophila pileata* from Estancia Virocay, Virasoro,  
17 Corrientes, Argentina, 15 December 2010 (B. L. L.); VII, *Sporophila melanogaster* from  
18 Rio Lava Tudo Lages, Santa Catarina, Brasil, 12 February 2008 (M. Repenning en López-  
19 Lanús 2008).

20

21 FIG. 4. A-B, ventral view of immature males of *S. ruficollis* (MACN-Or-7436, MACN-Or-  
22 67324). C-D, ventral view of immature males of *S. cinnamomea* (MACN-Or-52377,  
23 MACN-Or-52376). E-G, ventral view of adult males of *S. iberensis* sp. nov. (MACN-Or-  
24 72856, MACN-Or-72855, MACN-Or-72854). Immature individuals of sympatric

1 capuchinos of genus *Sporophila* show the characteristic irregular pattern of mixed  
2 coloration on ventral side and notable yellowish bill.

3

4 FIG. 5. A) Map showing all known localities (black circles) for *Sporophila iberaensis* sp.  
5 nov. in Argentina, Paraguay and Brazil. B) Inset map of the province of Corrientes,  
6 Argentina, where are located the Esteros del Iberá showing the distribution of the records of  
7 *S. iberaensis* from authors (black circles) and other sources (white circles) around 10  
8 localities. The stars represent the localities of the paratype series: MACN-Or-72854  
9 (holotype, Estancia San Alonso), MACN-Or-72855 (Reserva Cambyretá), and MACN-Or-  
10 72856 (Estancia El Tránsito).

11

12 FIG. 6. Landscape view of the Esteros del Iberá and habitat of *Sporophila iberaensis* sp.  
13 nov. A, Aerial photograph of sandy hills covered of wet grasslands of the Estancia San  
14 Alonso (type locality) along Paraná lagoon and Carambola stream (back of the image). B-  
15 C, Wet grasslands dominated by *Andropogon lateralis* and *Paspalum* sp. in territories of *S.*  
16 *iberaensis* in 2010-2011 (B, Estancia San Nicolás and C, near Estancia San Luis-  
17 Cambyretá). Photographs by A.S.D.G.

18

1 FIG. 1.

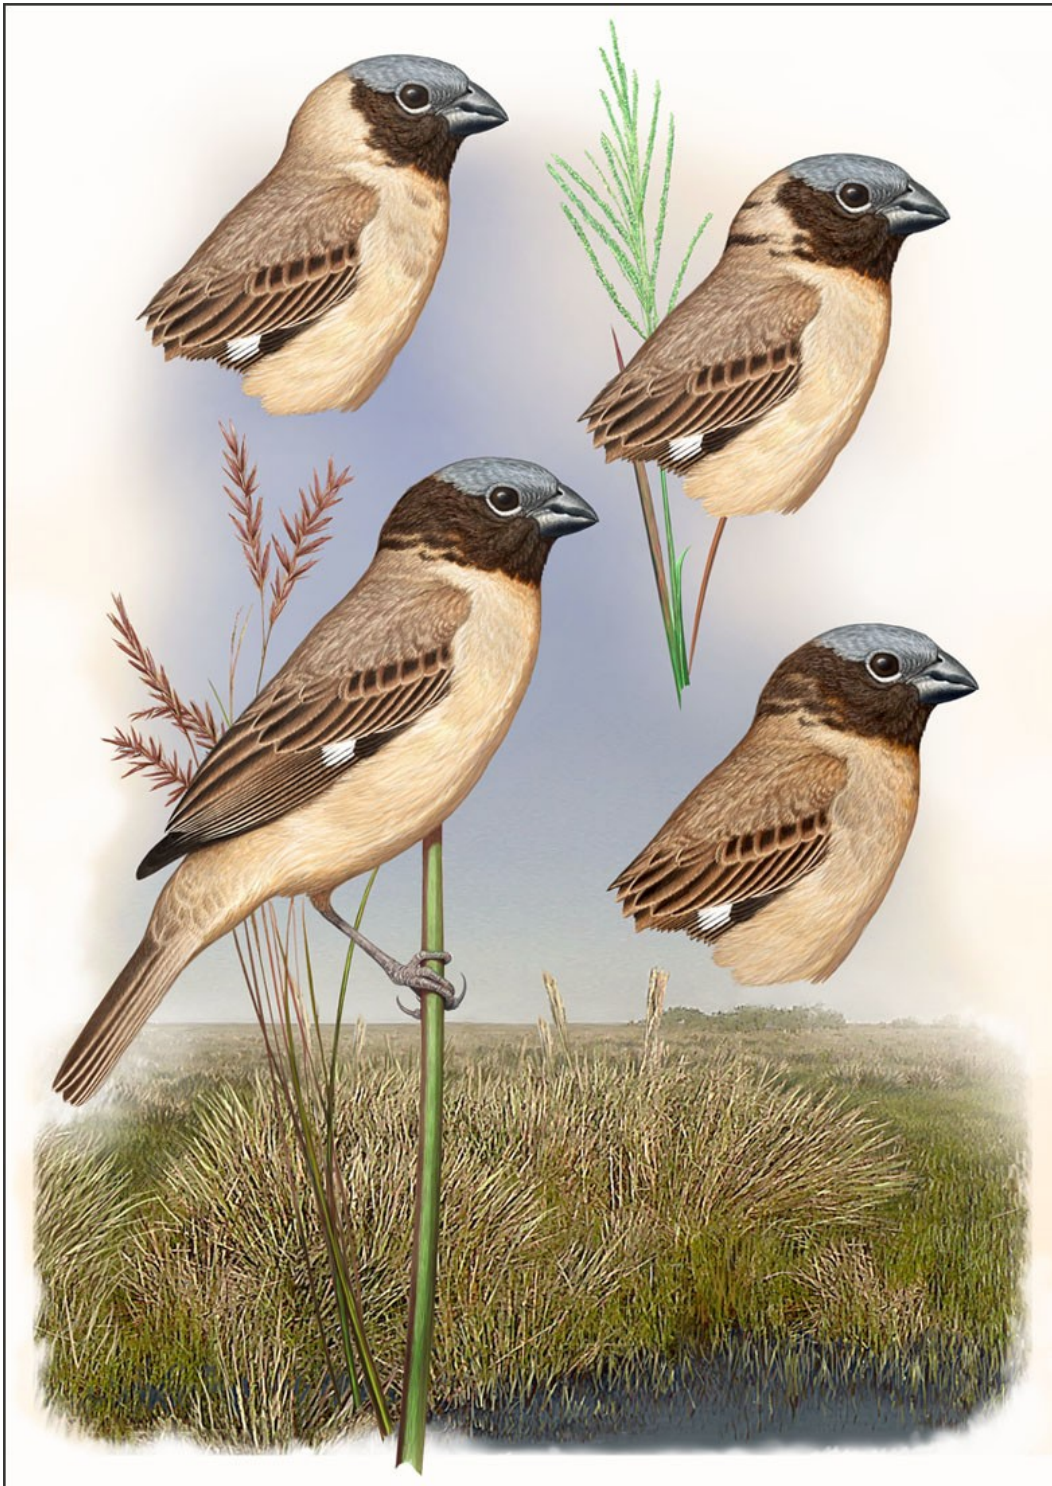

2

3



1 FIG. 2.

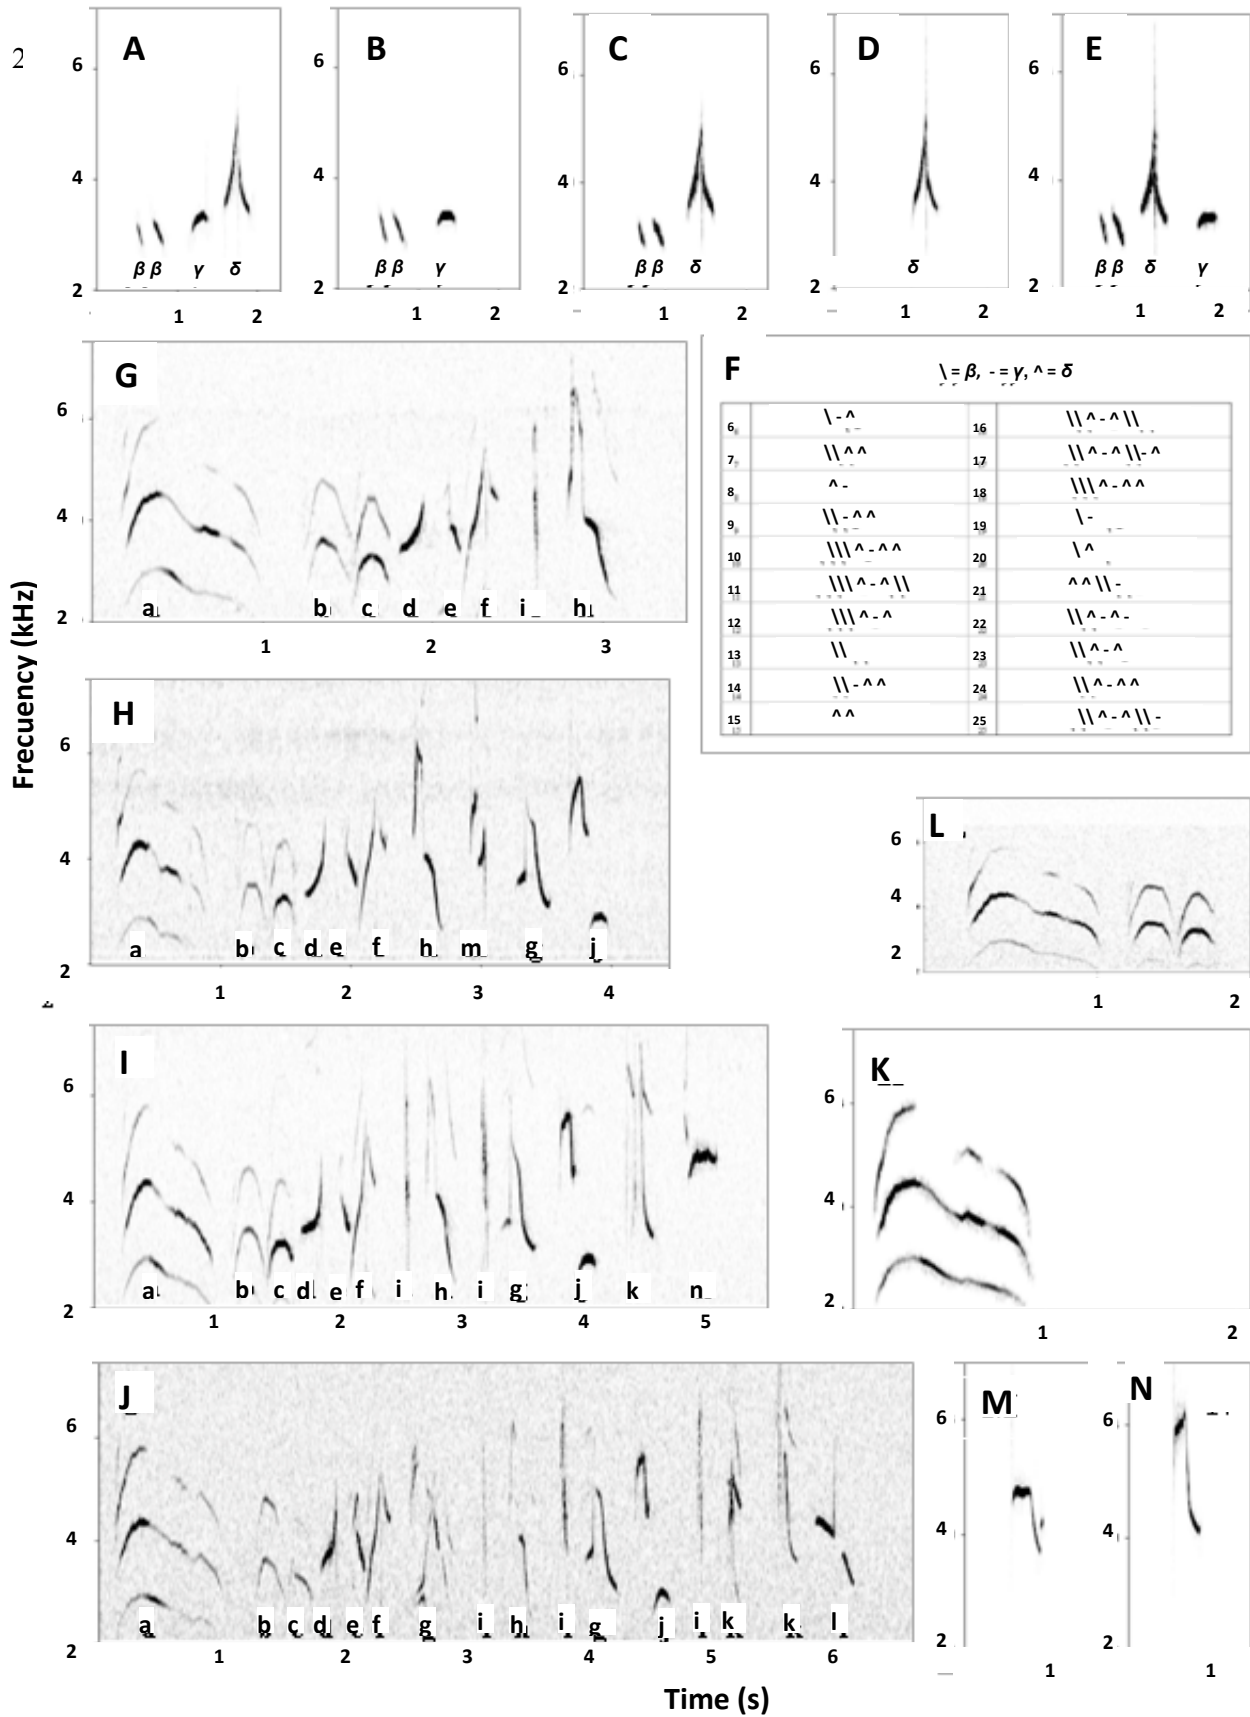

1 FIG. 3.

2

3

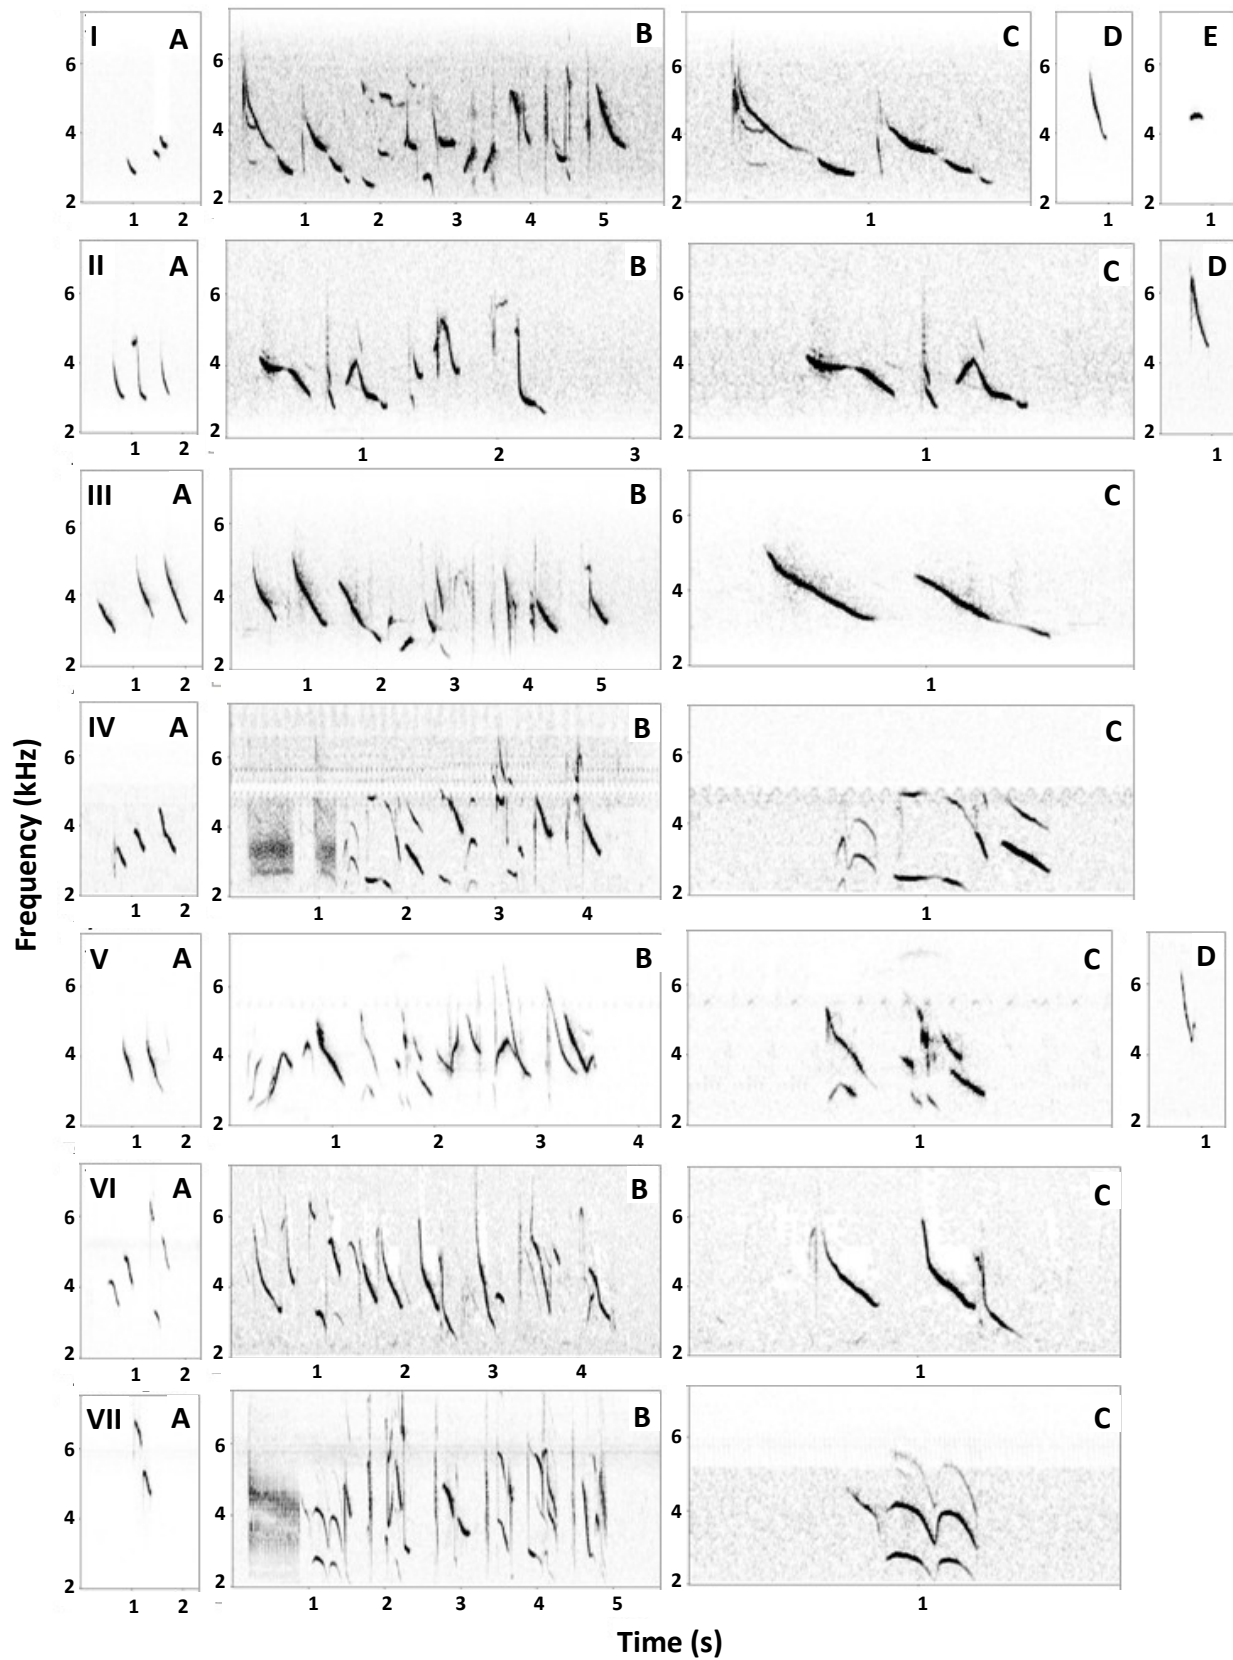

1 FIG. 4.

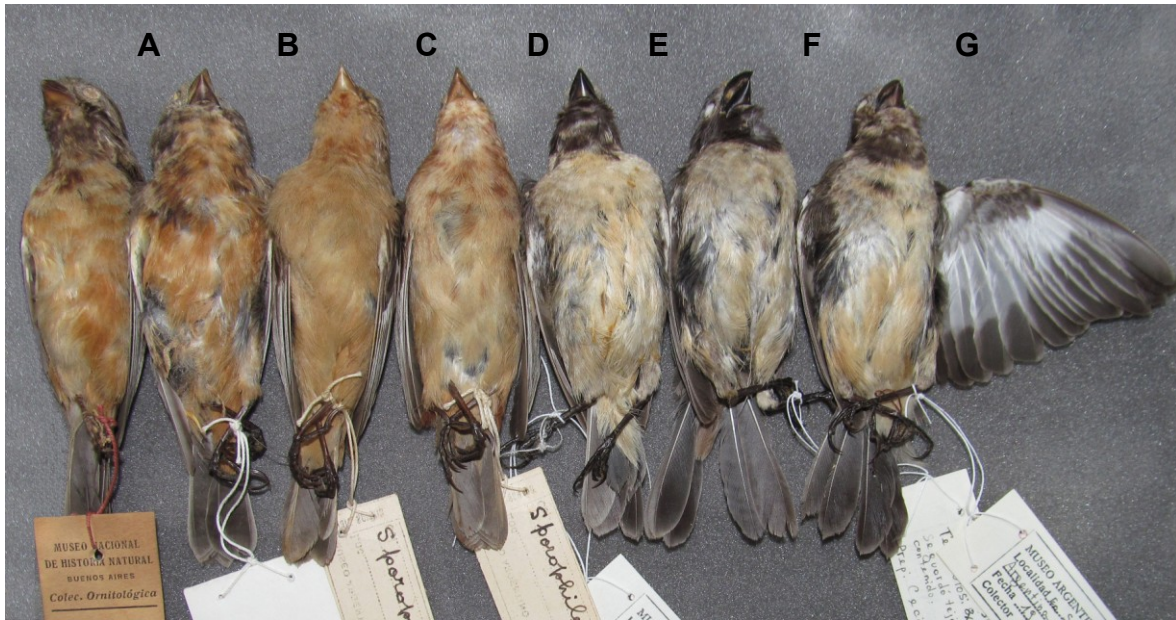

2

1 FIG. 5

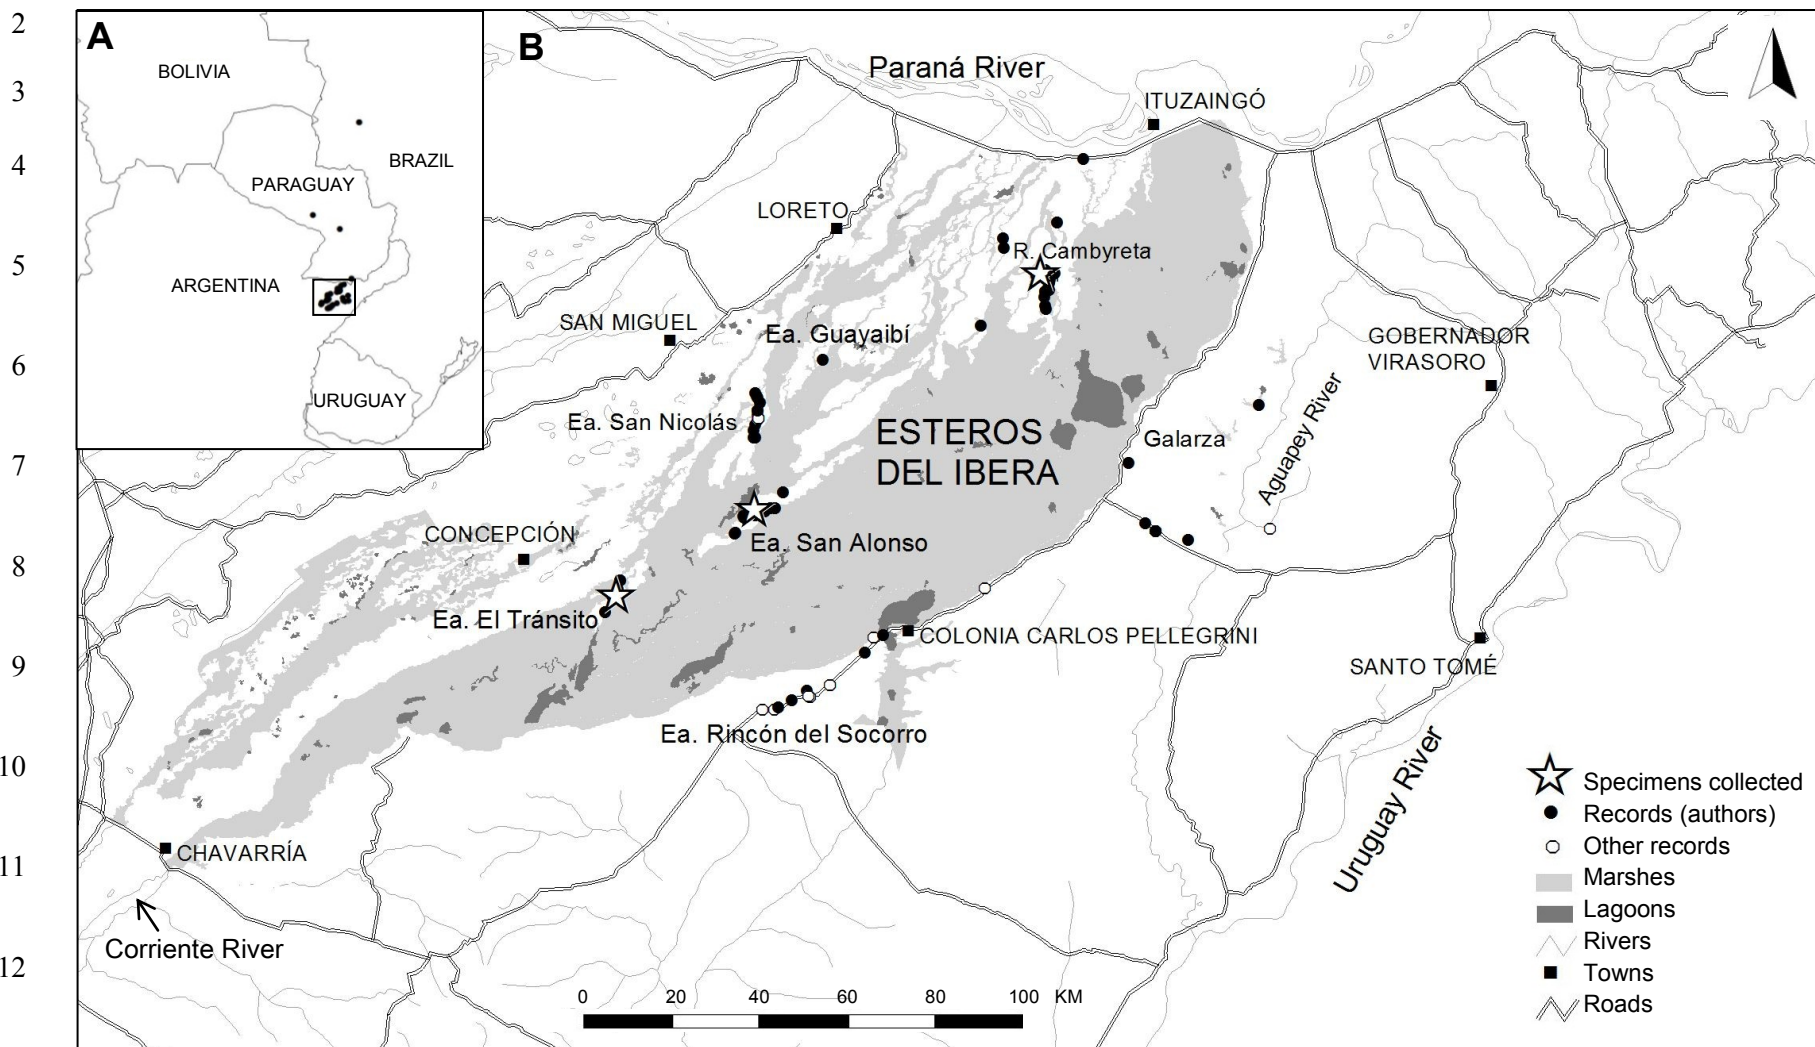

1 FIG. 6.

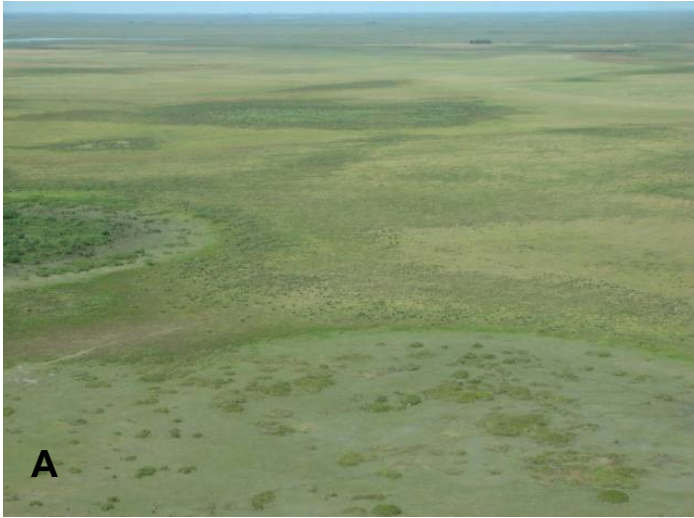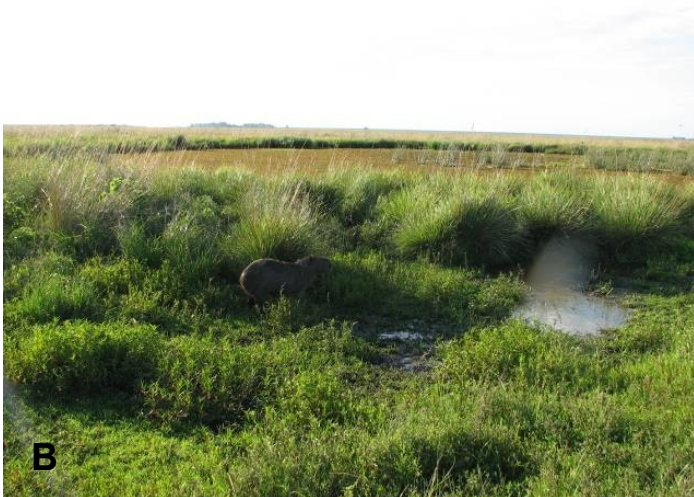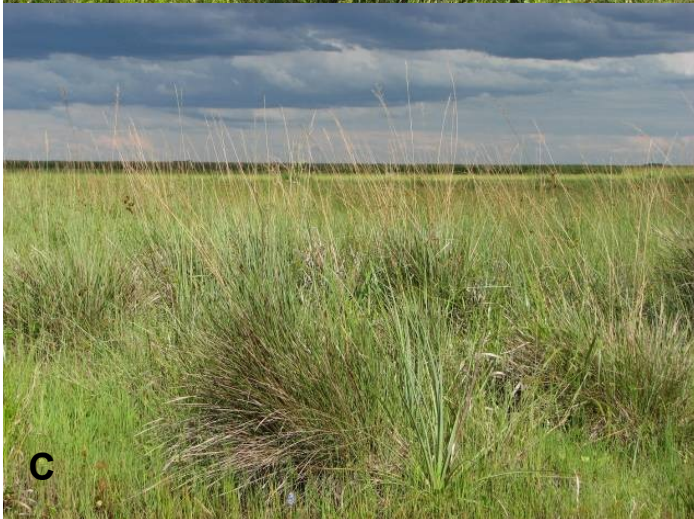

5

1 APPENDIX 1. Details of records of *S. iberaensis* sp. nov. obtained by authors (A. S. D.  
2 G., B. L. L. and C. K.) during this study in the province of Corrientes, Argentina. Records  
3 are grouped in localities as shown in Figure 5 (black circles in the inset map).

4  
5 Ituzaingó (1). One record on the National Road N12 13 km of access to Ituzaingó  
6 (27° 38' 3.6" S 56° 48' 48.4" W), 10 November 2009, photo and voice recorded, A. S. D. G.  
7 and Ariel Ocampo.

8 Reserva Cambyretá (2): Three records in the reserve (27° 45' 18.9" S 56° 51' 44" W,  
9 27° 51' 12.6" S 56° 52' 3.5" W, and 27° 54' 56.9" S 56° 53' 5.5" W) on 11 November 2009,  
10 voice recorded, A. S. D. G. and Ariel Ocampo; two records (27° 52' 14.7" S 56° 52' 41.1"  
11 W and 27° 57' 9.2" S 57° 0' 29.9" W) on 12 November 2009, A. S. D. G. and Ariel  
12 Ocampo; six records (27° 51' 7" S 56° 53' 37.1" W, 27° 50' 47.6" S 56° 53' 7.1" W, 27° 51'  
13 26.6" S 56° 54' 8.5" W, 27° 53' 15.6" S 56° 53' 7.5" W, 27° 53' 52.9" S 56° 53' 13.3" W,  
14 and 27° 55' 16.6" S 56° 53' 0.3" W), on 16 December 2010, A. S. D. G.; four records in  
15 Estancia Don Luis (27° 50' 51.7" S 56° 53' 5.4" W, 27° 51' 5.4" S 56° 53' 38.6" W, 27° 51'  
16 7.8" S 56° 53' 47" W, and 27° 51' 9.7" S 56° 53' 34.8" W), on 13 December 2011, voices  
17 recorded and one specimen collected, A. S. D. G. and B. L. L.; two records in Estancia San  
18 Ignacio (27° 53' 3.1" S 56° 52' 41.3" W and 27° 51' 55.8" S 56° 52' 33.8" W), on 13  
19 December 2011, B. L. L.; two records in Estancia Yaguareté Corá (27° 48' 15.9" S 56° 57'  
20 54" W and 27° 47' 7.5" S 56° 57' 59.1" W), on 13 December 2011, B. L. L.; five records in  
21 the reserve (27° 52' 47.2" S 56° 52' 46.5" W, 27° 51' 7" S 56° 53' 37.1" W, 27° 50' 47.6" S  
22 56° 53' 7.1" W, 27° 52' 14.7" S 56° 52' 41.1" W and 27° 53' 15.6" S 56° 53' 7.5" W), on 13  
23 December 2011.

1 Estancia Guayaibí (3): One record (28° 1' 4" S 57° 18' 38" W) on 30 December 2010,

2 B. L. L.

3 Estancia San Nicolás (4): One record (28° 6' 1" S 57° 25' 50.8" W) on 8 November

4 2009, photo and voice recorded, A. S. D. G. and Ariel Ocampo; four records (28° 7' 27.4" S

5 57° 26' 7.1" W, 28° 6' 54.8" S 57° 26' 9.8" W, 28° 8' 36.8" S 57° 26' 25.9" W and 28° 9'

6 12.4" S 57° 26' 34.2" W), on 13 December 2010, A. S. D. G.; two records (28° 8' 0.6" S 57°

7 26' 6.2" W and 28° 10' 0.9" S 57° 26' 32.2" W) on 14 December 2010, A. S. D. G.; three

8 records (28° 4' 54" W 57° 26' 24.7" S, 28° 10' 1" S 57° 26' 23.8" W, and 28° 6' 54.8" S 57°

9 26' 9.8" W) on 12 December 2011, A.S. D. G.; two records (28° 5' 15.6" S 57° 26' 11.3" S

10 and 28° 5' 28.3" S 57° 26' 8.9" W) on 12 February 2011, A. S. D. G. and C. K.; one record

11 (28° 6' 54.8" S 57° 26' 9.8" W) on 13 February 2011, A. S. D. G. and C. K.

12 Estancia San Alonso (5): two records (28° 16' 18.6" S 57° 23' 13.5" W and 28° 21' 5"

13 S 57° 28' 44.5" W) on 12 December 2009, Ariel Ocampo; six records (28° 18' 11.6" S 57°

14 26' 31.3" W, 28° 18' 29" S 57° 25' 20.8" W, 28° 18' 7.4" S 57° 24' 8.1" W, 28° 18' 10.1" S

15 57° 26' 22.5" W, 28° 18' 12.2" S 57° 26' 15.5" W and 28° 18' 11" S 57° 24' 39.9" W) on 27

16 December 2010, voice records, B. L. L.; three records (28° 18' 52.9" S 57° 27' 17" W, 28°

17 19' 16.2" S 57° 27' 41.1" W, and 28° 19' 5" S 57° 27' 44.9" W) on 28 December 2010, voice

18 records, B. L. L.; one record (28° 18' 10.1" S 57° 26' 25.5" W) on 19 February 2011, voice

19 records, one specimen collected, B. L. L.; seven records (28° 18' 11.8" S 57° 26' 14.7" W,

20 28° 18' 16.8" S 57° 26' 31.3" W, 28° 18' 44.7" S 57° 26' 59.7" W, 28° 18' 48.6" S 57° 27'

21 2.8" W, 28° 19' 0.2" S 57° 27' 1.7" W, 28° 18' 56.4" S 57° 26' 25.4" W, and 28° 18' 55.1" S

22 57° 26' 23.7" W) on 20 February 2011, voice records, B. L. L.; two records (28° 18' 11.6"

23 S 57° 26' 31.3" W, 28° 21' 0.6" S 57° 28' 38.2" W) on 14 January 2012, voice records, B. L.

1 L. and Máximo López-Lanús; two records (28° 18' 1.9" S 57° 26' 35.4" W and 28° 18'  
2 20.4" S 57° 25' 41.9" W) on 15 January 2012 voice records, B. L. L.

3 Estancia El Tránsito (6): one record (28° 26' 25.1" S 57° 41' 54.3" W) on 7 November  
4 2009, A. S. D. G. and Ariel Ocampo; one record (28° 30' 7.4" S 57° 43' 35.9" W) on 8  
5 November 2009, A. S. D. G. and Ariel Ocampo; one record (28° 28' 18" S 57° 42' 46.6" W)  
6 on 10 November 2010, A. S. D. G.; six records (28° 28' 2.3" S 57° 42' 21.9" W, 28° 40'  
7 11.7" S 57° 22' 11.9" W, 28° 27' 59.9" S 57° 42' 17.7" W, 28° 26' 25.1" S 57° 41' 54.3" W,  
8 28° 27' 28.1" S 57° 42' 9.6" W and 28° 27' 59.9" S 57° 42' 17.7" W) on 15 December 2011,  
9 voice record, A. S. D. G., B. L. L. and C. K.

10 Estancia Rincón del Socorro (7): two records (28° 34' 41.8" S 57° 13' 50.1" W and 28°  
11 41' 2.5" S 57° 23' 46.2" W) on 12 November 2009, A. S. D. G. and Ariel Ocampo; one  
12 record (28° 39' 8.7" S 57° 20' 28.2" W) on 16 December 2011, A. S. D. G.

13 Colonia Carlos Pellegrini (8): one record (28° 32' 45.8" S 57° 11' 44.9" W) on 12  
14 November 2009, A. S. D. G. and Ariel Ocampo.

15 Aguapey River (9): one record on the secondary road (28° 6' 15.6" S 56° 28' 39.5" W)  
16 12 November 2009, A. S. D. G. and Ariel Ocampo; one record in Estancia La Sirena (28°  
17 21' 45.7" S 56° 36' 45.6" W) on 26 November 2011, B. L. L.; three records in Estancia La  
18 Clarita (28° 19' 54.5" S 56° 41' 41" W, 28° 20' 48.8" S 56° 40' 28" W and 28° 20' 48.8" S  
19 56° 40' 28" W) on 30 November 2011, voice records, B. L. L. and Adrián Galimberti.

20 Galarza (10): one record (28° 12' 55" S 56° 43' 32" W) on 18 October 2001, A. S. D.  
21 G.  
22



1 APPENDIX 2. Details of additional records of confirmed (available photograph and  
2 voice records) and possible (available photograph) *S. iberaensis* sp. nov. obtained through  
3 consultation with colleagues and bird photographers who had posted in Internet photos or  
4 recordings labeled as belonging to 'young' or 'immature' *S. ruficollis*. Records are grouped  
5 by localities as shown in Figure 5 (black circles in regional small map A, and white circles  
6 in the inset map B).

7  
8 *Argentina, province of Corrientes*. Estancia San Nicolás (4): five records (28° 7' 52.7"  
9 57° 26' 0.6") on 5 December 2011, voice record, Carlos Figuerero (*in litt.*). Estancia Rincón  
10 del Socorro (7): one record (approximated coordinates 28° 39' 48.9" 57° 20' 6") on 3  
11 November 2008, one record on 17 October 2009, two records on 14 October 2009 and one  
12 record on 8 December 2009, Carlos Figuerero (*in litt.*); one record (28° 39' 43.9" 57° 20'  
13 16.5") on 14 October 2010, Rosana Ursino and Pablo Mosto ([http://www.foto-](http://www.foto-mundosilvestre.com/data/media/1/capuchno_garganta_caf_0082.jpg)  
14 [mundosilvestre.com/data/media/1/capuchno\\_garganta\\_caf\\_0082.jpg](http://www.foto-mundosilvestre.com/data/media/1/capuchno_garganta_caf_0082.jpg)); one record (28° 41'  
15 19.7" 57° 25' 34.2") on 14 January 2012, Ángel Luis Prato  
16 (<http://www.ecoregistros.com.ar/site/imagen.php?id=11257>). Colonia Carlos Pellegrini (8):  
17 one record in Cambá Trapo (28° 27' 20.6" 57° 0' 1.4") on 14 October 2009, Carlos  
18 Figuerero (*in litt.*), one record near the town (28° 41' 15.5" 57° 24' 13.6"), on 11 March  
19 2010, Natalia Villanova ([http://www.foto-](http://www.foto-mundosilvestre.com/data/media/10/juvenil_g.cafe.jpg)  
20 [mundosilvestre.com/data/media/10/juvenil\\_g.cafe.jpg](http://www.foto-mundosilvestre.com/data/media/10/juvenil_g.cafe.jpg)); Aguapey River (9): one record in  
21 Estancia La Clarita (28° 20' 48.8" 56° 40' 28") on 30 November 2010, Adrián Galimberti (*in*  
22 *litt.*).

1           *Brazil*. One record from Pousada Aguapé in Aquidauana, state of Mato Grosso do Sul  
2 (20° 5' 44" 55° 57' 54") on 9 January 2005, Josep del Hoyo (Internet Bird Collection,  
3 <http://ibc.lynxeds.com/species/dark-throated-seedeater-sporophila-ruficollis>).

4           *Paraguay*. One record from Arroyo y Esteros km 74, department Cordillera (25° 1'  
5 38.3" 56° 51' 32.6") on October 2008, Paul Smith (Aves Paraguay,  
6 [http://www.faunaparaguay.com/sporophila\\_ruficollis.html](http://www.faunaparaguay.com/sporophila_ruficollis.html)). One record in “Bajo Chaco”  
7 department Presidente Hayes (24° 23' 3.5" 58° 6' 50.5") from October 2008, Clyde Morris  
8 (Aves Paraguay, [http://www.faunaparaguay.com/sporophila\\_ruficollis.html](http://www.faunaparaguay.com/sporophila_ruficollis.html)). Two records  
9 from San Cosme y Damian, department Itapua (27° 19' 13.1" 56° 19' 53.6") on 6 October  
10 2011, Claudio Dias (Wiki Aves Brasil, <http://www.wikiaves.com/535628> and [469585](http://www.wikiaves.com/469585)).

11 One record (not mapped) without date and locality from “Paraguay”, Frank Fragano (Aves  
12 Paraguay, [http://www.faunaparaguay.com/sporophila\\_ruficollis.html](http://www.faunaparaguay.com/sporophila_ruficollis.html)).

13

1 APPENDIX 3. List of specimens of genus *Sporophila* examined and measured for this  
2 study at Museo Argentino de Ciencias Naturales “Bernardino Rivadavia” (MACN, Buenos  
3 Aires, Argentina).

4 *S. iberensis* (N=3): MACN-Or-72854, 72855, 72856.

5 *S. ruficollis* (N=53): MACN-Or-66435, 66054, 66130, 67354, 66075, 66076, 56172,  
6 66131, 56118, 66011, 67335, 66913, 66243, 66053, 66012, 57955, 22430, 22424, 8560,  
7 22423, 22425, 22419, 18563, 18567, 22422, 7436a/b/c/d/e, 18584, 22426, 22421, 22427,  
8 18566, 6292a, 35183, 7349, 3791a, 8560a/b, 52745, 46176, 29992, 45375, 45374, 7349,  
9 6293a, 29991, 45376, 31392, 4215a. *S. ruficollis* ‘caraguata’(N=1): MACN-Or-40039.

10 *S. hypoxantha* (N=30): MACN-Or-66966, 58606, 64295, 60348, 56166, 64260, ,  
11 58607, 60080, 58610, 56365, 63998, 68358, 66167, 67451, 66126, , 7190, 7235a/b,  
12 7349a/b, 45378, 45370, 7436a/b, 29639, 29640, 45363, 45384, 45381, 45385.

13 *S. hypochroma* (N=25): MACN-Or-63967, 66894,66125, 66609, 66715, 66186,  
14 59949, 66132, 66918, 48247, 45380, 22312, 22364, 40038, 40037, 48470, 45379, 22309,  
15 22311, 40031, 43296, 45382, 43302, 40036, 68727.

16 *S. pileata* (N=15): MACN-Or-58605, 54925, 58604, 60774, 60773, 48220, 48234,  
17 9002, 38164, 8560, 48237, 9002, 8560, 48243, 48222.

18 *S. palustris* (N=4). MACN-Or-59947, 8961, 48513, 52379.

19 *S. cinnamomea* (N=5). MACN-Or-52373, 52374, 52375, 52376, 52379.

20

1 APPENDIX 4. List of recordings of capuchinos of genus *Sporophila* used for this study.

2 Codes of the recordings correspond to the following collections: MACN, Museo Argentino  
3 de Ciencias Naturales “Bernardino Rivadavia”, Buenos Aires, Argentina); XC, Xeno-canto  
4 (www.xeno-canto.org) and BLL, private collection of Bernabé López-Lanús.

5 *S. iberaensis* (N=27): MACN-Sn 00001/2013 to 00041/43. XC and Cornell -TBC

6 *S. ruficollis* (N=28): XC47168, XC47170, XC49699, XC49700, XC49703, XC49701,  
7 XC51910, XC51911, XC51912, XC51913, XC51914, XC51915, XC51916, XC51917,  
8 XC51918, XC51919, XC51920, XC51921, XC108337, XC50171, XC50172, XC108334,  
9 XC108338, XC108335, XC108336, XC108339, XC108341, XC108342.

10 *S. hypoxantha* (N=13): XC51949, XC51950, XC51951, XC51952, XC51953,  
11 XC61760, XC108328, XC108327, XC108323, XC108324, XC108325, XC108326,  
12 XC108329.

13 *S. hypochroma* (N=18): XC45246, XC51937, XC51939, XC51940, XC51941,  
14 XC51942, XC51943, XC51944, XC51945, XC51946, XC61759, XC108322, XC108313,  
15 XC108314, XC108316, XC108318, XC108321, XC108320.

16 *S. cinnamomea* (N=11): XC65741, XC47162, XC47163, XC49694, XC49695,  
17 XC49696, XC49697, XC51908, XC61758, XC49698, XC108306.

18 *S. palustris* (N=19): XC17868, XC17997, XC42440, XC47161, XC84742, XC49707,  
19 XC49708, XC49709, XC49710, XC49712, XC51931, XC51932, XC51933, XC51934,  
20 XC94481, XC49711, XC108331, XC108333, XC108330.

1           *S. pileata* (N=10): XC49693, XC49692, XC15927, BLL293/23, BLL293/24,  
2   BLL293/25, BLL294/125, and three recordings from M. Castelino published in López-  
3   Lanús (2008).

4           *S. melanogaster* (N=2): XC13513, XC41808.

5

6

7

8

9

1 FIG. 1. Optional (photo). Author: Carlos Figuerero.

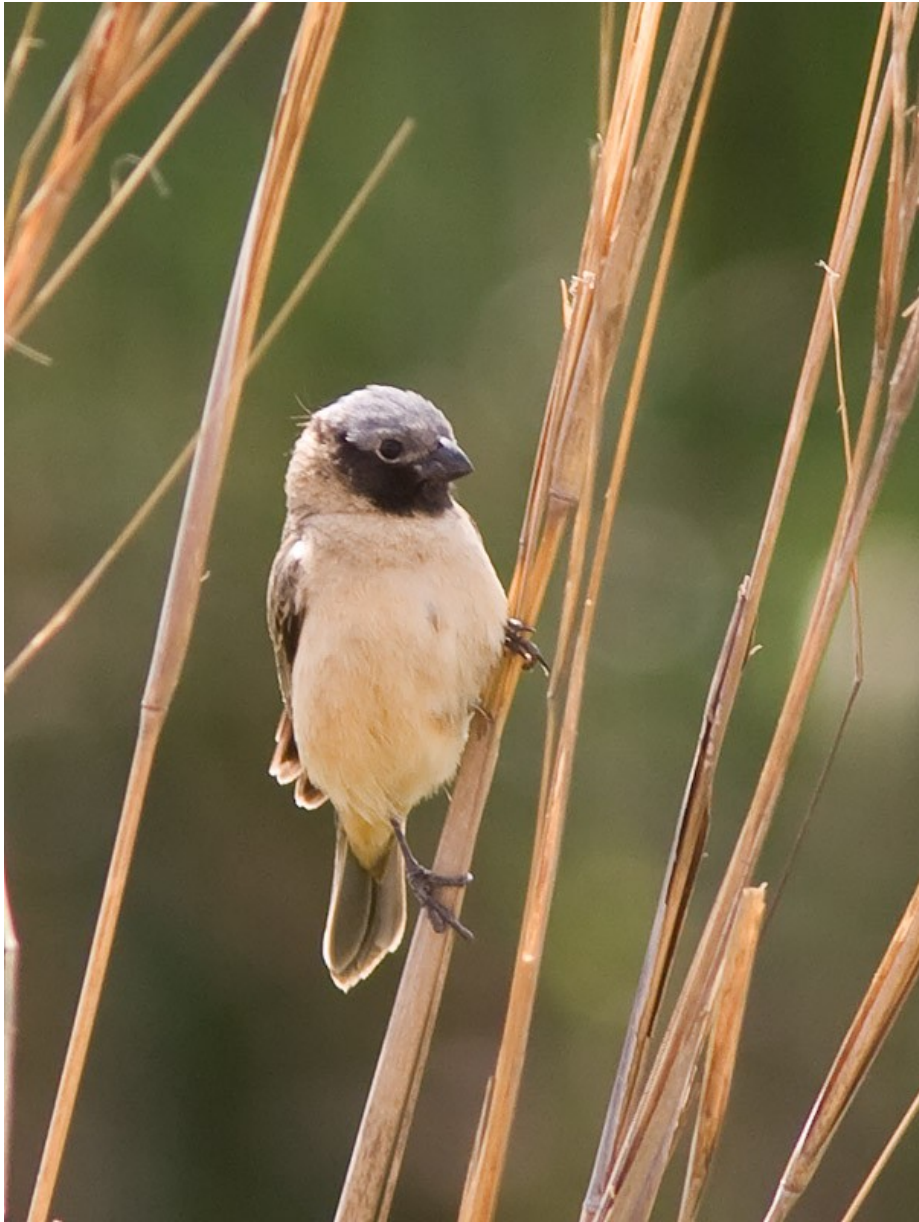

2
